1 **Nothing else matters? Tree diameter and living status have more effects than**  
2 **biogeoclimatic context on microhabitat number and occurrence: an analysis in**  
3 **French forest reserves.**

4

5 Yoan Paillet<sup>1,2,3\*</sup>, Nicolas Debaive<sup>4</sup>, Frédéric Archaux<sup>1</sup>, Eugénie Cateau<sup>4</sup>, Olivier Gilg<sup>4</sup>, Eric  
6 Guilbert<sup>2</sup>

7

8 <sup>1</sup> Irstea, UR EFNO, Domaine des Barres, 45290 Nogent-sur-Vernisson, France

9 <sup>2</sup> MECADEV, UMR 7179 MNHN/CNRS, CP50, 57 rue Cuvier, 75005 Paris, France

10 <sup>3</sup> Univ. Grenoble Alpes, Irstea, LESSEM, 38000 Grenoble, France

11 <sup>4</sup> Réserves Naturelles de France, La Bourdonnerie, 2 allée Pierre Lacroute – CS 67524 –  
12 21075 Dijon cedex

13 \*Corresponding author: [yoan.paillet@irstea.fr](mailto:yoan.paillet@irstea.fr)

14

15 **Keywords:** Tree-related microhabitats; Diameter at breast height; Tree vitality; Biodiversity  
16 indicator; Small Natural Features.

17 **Abstract**

18 Managing forests to preserve biodiversity requires a good knowledge not only of the factors  
19 driving its dynamics but also of the structural elements that actually support biodiversity. Tree-  
20 related microhabitats (e.g. cavities, cracks, conks of fungi) are tree-borne features that are  
21 reputed to support specific biodiversity for at least a part of species' life cycles. While several  
22 studies have analysed the drivers of microhabitats number and occurrence at the tree scale,  
23 they remain limited to a few tree species located in relatively narrow biogeographical ranges.  
24 We used a nationwide database of forest reserves where microhabitats were inventoried on  
25 more than 22,000 trees. We analysed the effect of tree diameter and living status (alive or  
26 dead) on microhabitat number and occurrence per tree, taking into account biogeoclimatic  
27 variables and tree genus.

28 We confirmed that larger trees and dead trees bore more microhabitats than their smaller or  
29 living counterparts did; we extended these results to a wider range of tree genera and  
30 ecological conditions than those studied before. Contrary to our expectations, the total number  
31 of microhabitat types per tree barely varied with tree genus – though we did find slightly higher  
32 accumulation levels for broadleaves than for conifers – nor did it vary with elevation or soil pH,  
33 whatever the living status. We observed the same results for the occurrence of individual  
34 microhabitat types. However, accumulation levels with diameter and occurrence on dead trees  
35 were higher for microhabitats linked with wood decay processes (e.g. dead branches or  
36 woodpecker feeding holes) than for other, epixylic, microhabitats such as epiphytes (ivy,  
37 mosses and lichens).

38 Promoting large living and dead trees of several tree species may be a relevant, and nearly  
39 universal, way to favour microhabitats and enhance the substrates needed to support specific  
40 biodiversity. In the future, a better understanding of microhabitat drivers and dynamics at the  
41 tree scale may help to better define their role as biodiversity indicators for large-scale  
42 monitoring.

43

## 44 **Introduction**

45 Small natural features are structural habitat elements that have a disproportionately important  
46 role for biodiversity related to their actual size [1]. Taking these features into account in  
47 biodiversity conservation strategies is a crucial step in science-based decision making [2].  
48 Identifying such structural features in a tri-dimensional forest environment is quite challenging  
49 since their number and variety is potentially infinite. Small natural features include, for example,  
50 large old trees [3] as well as tree-borne structures. While large old trees are disappearing at  
51 the global scale [4], their importance for biodiversity has not yet been fully elucidated, not to  
52 mention the peculiar structures they may bear (eg. cracks, cavities, epiphytes), also known as  
53 'tree-related microhabitats' (hereafter 'microhabitats' [5]). Microhabitats have recently aroused  
54 the interest of scientists and forest managers alike since these structures can be a substrate  
55 for specific forest biodiversity [6], and can ultimately serve as forest biodiversity indicators [5,  
56 7, 8]. Their conservation has hence become an issue in day-to-day forest management, as  
57 have large old trees and deadwood [9, 10]. However, our understanding of the drivers and  
58 dynamics influencing these microhabitats, notably at the tree scale, remains incomplete [11].  
59 Tree diameter and living status (living vs. dead trees) are key factors for microhabitat diversity  
60 at the tree scale [12-14]. Larger trees are likely to bear more microhabitats than smaller ones,  
61 as they have experienced more damage, injuries and microhabitat-creating events (e.g.  
62 woodpecker excavation, storms, snowfalls). Similarly, gradually decomposing dead trees are  
63 likely to bear more microhabitats than living trees and play a role as habitat and food sources  
64 for many microhabitat-creating species [15]. Nevertheless, the relationships between  
65 microhabitats and tree characteristics have only been demonstrated on a limited number of  
66 tree species involving at most a few thousand observations at the tree level (e.g. [11-13]),  
67 which have been carried out within a limited biogeographical range (e.g. in Mediterranean  
68 forests [16], the French Pyrenees [12] or in Germany [17, 18]). Consequently, it remains to be  
69 understood whether the observed relationships between tree characteristics and microhabitats  
70 – even though they seem to be relatively consistent across studies – are merely idiosyncratic,  
71 notably in terms of magnitude. Large databases making larger-scale analyses possible are

72 rare (but see [19]), mainly due to a lack of homogeneity in the typologies used to inventory  
73 microhabitats [5] and a lack of forest microhabitat monitoring initiatives. Large-scale data are,  
74 nonetheless, crucial to better understanding the potential variations in the relationships  
75 between microhabitat and biotic (e.g. tree species) or abiotic (e.g. climatic) factors, with a view  
76 to validating microhabitats as potential biodiversity indicators at various scales [7, 8, 18].

77 We used a nationwide database resulting from standardized monitoring in forest reserves,  
78 where microhabitats have been inventoried since 2005. We analysed the influence of individual  
79 tree diameter and living status on the number and occurrence of microhabitat types at the tree  
80 level. We expected the number and occurrence of microhabitats per tree to increase with  
81 diameter and to be higher on dead than on living trees. We assessed the influence of tree  
82 species and biogeoclimatic variables on these relationships, expecting that microhabitat  
83 dynamics (or accumulation rate per tree) would be tree-species dependent and would vary  
84 with abiotic context (higher accumulation rates in harsher conditions: e.g. at high elevations or  
85 on acidic soils). Ultimately, the aim of this study was to provide forest managers with a better  
86 science-based knowledge of microhabitats in the forest ecosystem, thus allowing them to  
87 adapt their management to specific local contexts.

88

## 89 **Materials and methods**

### 90 Database structure

91 We worked with a nationwide database compiled from a monitoring program in French forest  
92 reserves. Since 2005, a systematic permanent plot network has gradually been set-up on a  
93 voluntary basis in forest reserves. The main objectives of this network are (i) to better  
94 understand the dynamics of forest ecosystems subjected to varying degrees of management,  
95 (ii) to provide reserve managers with quantitative data on the flux of living and dead trees at  
96 the site scale, and (iii) to ultimately provide guidelines for establishing management plans. The  
97 full database currently includes 107 reserves for a total of 8190 plots (83180 living and 19615

98 dead trees, snags or stumps). The forest reserves in the database actually encompass three  
99 broad types of protection status. First, (i) strict forest reserves, where harvesting has been  
100 abandoned for a variable timespan and (ii) special forest reserves, where management is  
101 targeted towards specific biodiversity conservation measures (e.g. preservation of ponds).  
102 These two types are owned and managed by the French National Forest Service. The third  
103 type, nature reserves, on the other hand, where management varies from abandonment to  
104 classic wood production, may be of various ownership types (state, local authorities, private).  
105 It should be noted that no homogeneous data on management intensity or time since last  
106 harvesting could be gathered at the plot level for all the reserves in the database. However,  
107 Vuidot et al. [13] showed that management has a limited effect on microhabitat number and  
108 occurrence at the tree level. We thus assumed that management differences would not play a  
109 significant role at the tree scale and therefore, did not take management type or intensity into  
110 account in our analyses (but see discussion).

111

#### 112 Stand structure and microhabitat inventories

113 On each plot, we combined two sampling methods to characterise forest stand structure [20].  
114 For all living trees with a diameter at breast height (DBH) above 30 cm, we used a fixed angle  
115 plot method to select the individuals comprised within a relascope angle of 3%. Practically,  
116 this meant that sampling distance was proportional to the apparent DBH of a tree. For example,  
117 a tree with a DBH of 60 cm was included in the sample if it was within 20 m of the centre of the  
118 plot. This particular technique allowed us to better account for larger trees at a small scale. All  
119 other variables were measured on fixed-area plots. Within a fixed 10-m (314 m<sup>2</sup>) radius around  
120 the plot centre, we measured the diameter of all living trees and snags (standing dead trees  
121 with a height > 1.30 m) from 7.5 to 30 cm DBH. Within a 20-m radius (1256 m<sup>2</sup>), we recorded  
122 all snags with a diameter > 30 cm. Whenever possible, we identified all trees, both alive and  
123 dead, to species level. In the subsequent analyses, we grouped some tree species at the  
124 genus level to have sufficient representation in terms of tree numbers. This resulted in the

125 following groups: ash (*Fraxinus excelsior* L.), beech (*Fagus sylvatica* L.), chestnut (*Castanea*  
126 *sativa* Mill.), fir (*Abies alba* Mill.), hornbeam (*Carpinus betulus* L.), larch (*Larix decidua* Mill.),  
127 maple (90% sycamore maple, *Acer pseudoplatanus* L.), oak (80% sessile, *Quercus petraea*  
128 (Matt.) Liebl., and pedunculate, *Q. robur* L., oaks combined, 15% oaks identified to the genus  
129 level only, 5% other oaks – mainly Mediterranean), pine (64% Scots pine, *Pinus sylvestris* L.,  
130 22% mountain pine, *Pinus mugo* Turra), poplar (*Populus* spp.) and spruce (*Picea abies* (L.) H.  
131 Karst. We assumed that tree genus, rather than species, influenced the relationships we were  
132 studying. Unidentified species were excluded from the analyses.

133 We visually inspected all selected standing trees for microhabitats and recorded their presence  
134 on each tree. Observers attended a training session and were given a field guide with pictures  
135 to help them better determine microhabitat types and detailed criteria to include in the  
136 inventories. Although inventory methods have recently improved [5, 21], we assumed that the  
137 method we used limited any potential observer effect linked with microhabitat inventories [22].

138 Different microhabitat typologies were used concomitantly during the inventories and  
139 harmonization has been lacking since 2005. Consequently, we only retained data with a  
140 homogeneous typology. We preferred this solution rather than grouping microhabitat types to  
141 avoid coarser classification with too much degradation of the original dataset.

142

#### 143 Data selection and biogeoclimatic variables extraction

144 First, we focused on the microhabitat typology that was used for the largest number of plots  
145 and sites (Table 1). This reduced the dataset to 43 sites comprising 3165 plots (Figure 1, Table  
146 S1). Second, the smallest trees ( $7.5 \leq \text{DBH} \leq 17.5$  cm) accounted for 36% of the trees in the  
147 database but were also the least likely to bear microhabitats [12, 13]. We therefore excluded  
148 this category from the dataset to avoid zero-inflation in the subsequent models. Third, previous  
149 studies had shown that tree living status (i.e. living vs. dead trees, see below) is a major driver  
150 of microhabitat occurrence and density [12, 13]. To properly account for this variable in our

151 statistical models, we excluded all tree species/genera with less than 50 standing dead trees  
152 or snags in the dataset (ie. ash, chestnut, hornbeam, larch, maple, poplar, see Table 2 for  
153 distribution by genus and diameter classes and Supplementary Material, Figure S1, for a  
154 calculation based on a larger subset of living trees). The final dataset comprised 2783 plots  
155 distributed over 43 sites, for a total of 22307 trees (20312 living and 1995 dead trees belonging  
156 to five genera of both dead and living trees, Table 2).

157 In addition, we gathered different biogeoclimatic data from various sources to reflect plot  
158 characteristics:

- 159 - annual mean temperature (bio1) and precipitation (bio12) from the Worldclim2  
160 database [23];
- 161 - elevation, aspect and slope from the national digital elevation model (resolution 30 m);
- 162 - soil plant-bioindicated pH from the National Forest Inventory [24].

163

#### 164 Statistical analyses

165 Following Zuur et al. [25], preliminary data exploration did not reveal any potential variation in  
166 the relationship between microhabitat metrics and any of the biogeoclimatic variables  
167 mentioned above, apart from pH and elevation. We therefore kept pH and elevation only in the  
168 analyses described below. However, elevation correlated strongly to tree species; indeed, only  
169 beech and pine were distributed over the whole elevation gradient while the other species were  
170 elevation-dependent. Conversely, genera were relatively well distributed over the pH gradient.

171 We used DBH, living status (alive vs. dead) and genus (beech, fir, oak, pine and spruce) as  
172 explanatory variables and included second and third order interactions between DBH, living  
173 status and genus in the models. We added elevation and pH as covariables, but only included  
174 pH in the second order interactions. Since beech and pine were not strongly biased by  
175 elevation, we added elevation in the second order interactions for these two genera in two  
176 separate analyses.

177 To model the total number of microhabitat types per tree, we used generalised linear mixed  
178 models (GLMMs, library glmmTMB, [26]) with a Poisson error distribution for count data and  
179 plot identity nested within site as a random variable. We also modelled the occurrence of each  
180 microhabitat type, but with a binomial error distribution for binary data. We tested differences  
181 in microhabitat numbers and occurrences between living and dead trees with post-hoc multi-  
182 comparison Tukey tests for a fixed mean DBH (44 cm; function cld, library emmeans [27]).  
183 Dispersion diagnostics revealed under-dispersed model estimations, which may cause a  
184 type II error rate inflation [28]. However, since there was no simple way to account for that in  
185 a frequentist framework, we kept the results while bearing in mind that they were undoubtedly  
186 conservative despite the large number of observations we analysed. In addition, we focused  
187 our interpretations on the magnitude of the results rather than their statistical significance (see  
188 e.g. [29]). We processed all the analyses with the R software v. 3.4.3 [30].

189

## 190 **Results**

### 191 Number of microhabitat types per tree

192 Estimates for all single parameters were significant in the model, except for soil pH, while  
193 second and third order interactions were less often significant (see Supplementary Materials,  
194 Table S2). All tree genera but pine had higher microhabitat numbers on dead than on living  
195 trees. Overall, the difference was the highest for oak (22% more microhabitats on dead than  
196 on living trees, for a mean DBH of 44 cm, Table 3); the other genera had around 10-15% more  
197 microhabitats on dead than on living trees. Globally, the number of microhabitats per tree  
198 increased with tree diameter, both for living and dead trees (Figure 2). However, the  
199 accumulation of microhabitats with diameter varied with genus (the two broadleaves' genera  
200 investigated, beech and oak, had higher accumulation levels than the three conifers' genera,  
201 fir, pine, spruce), and according to living status (dead versus living trees, except for pine; Figure  
202 2, Supplementary Materials, Table S2). These results were generally consistent with those  
203 obtained with the analyses concerning a higher number of genera but for living trees only



204 (Figure S1). Broadleaves (ash, beech, chestnut, hornbeam, maple, oak, poplar) showed higher  
205 microhabitat accumulation rates than conifers (fir, larch and spruce). Only pine showed  
206 accumulation rates comparable to broadleaves (Figure S1).

207 Number of microhabitats increased significantly with elevation, but not with soil pH. However,  
208 higher soil pH had a positive effect on the accumulation of microhabitats with DBH (the second  
209 order interaction was significant), mostly on dead trees (Supplementary Materials, Table S2).  
210 Still, the effects of elevation and soil pH remained small compared to those of DBH and living  
211 status.

212 For beech and pine, the overall results converged with those of the complete model. Soil pH  
213 and elevation only had significant effects in the interaction terms (Supplementary Materials:  
214 Table S4): increasing soil pH increased microhabitat accumulation with DBH for both species,  
215 with a stronger effect for pine than for beech. On the other hand, increasing soil pH decreased  
216 microhabitat richness on living compared to dead trees. Elevation interacted significantly with  
217 living status for beech only, and almost doubled the difference between living and dead trees,  
218 whereas for pine, the effects were only marginally significant ( $p < 0.1$ ), though high in  
219 magnitude.

220

#### 221 Occurrence of microhabitat types per tree

222 Six microhabitats out of twenty generally occurred more frequently on standing deadwood than  
223 on living trees, though this was not systematic for all genera or even for living status: trunk  
224 cavities (except fir), woodpecker feeding holes (Figure 3), rot (except fir), conks of fungi, bark  
225 characteristics and crown skeleton (except fir, Table 3 and Supplementary Materials, Table  
226 S5). We observed the strongest differences for woodpecker feeding holes: whatever the  
227 genera, they virtually only occurred on standing dead trees (i.e. they were nearly absent from  
228 living trees, Figure 3, Table 3). Conversely, injuries, dead branches whatever their size and

229 forks (broadleaves only) occurred more frequently on living trees. Magnitudes for microhabitats  
230 more frequent on living trees were around 60% to 90% (Table 3).

231 For most microhabitats, the probability of occurrence increased with DBH both for living and  
232 dead trees, with the remarkable exceptions of canopy cavities, woodpecker cavities and crown  
233 skeletons (Supplementary Materials: Figure S2, Table S5). However, the magnitude of the  
234 relation varied with tree genus and living status. For some microhabitat types, the increase in  
235 probability of occurrence with DBH was stronger for dead than for living trees, e.g.: +35% base  
236 and trunk cavities on dead vs. +18% on living beech; +23 to +42% for woodpecker feeding  
237 holes on dead vs. +0.2 to +3% on living trees (Table S3). Conversely, the increase in  
238 probability of occurrence of small and medium dead branches was stronger for living trees  
239 (e.g. +53% medium dead branches on living vs. 0.7% on dead oak) and, to a lesser extent, for  
240 mosses on beech and fir (+20% and +24% on living trees, vs. +9% and +16% on dead trees,  
241 respectively). All other increments with DBH for living trees were smaller, generally below 10%.  
242 Note that in some cases, due to the very limited number of occurrences for some microhabitats  
243 on certain tree genera, the estimates proved unreliable (huge confidence intervals, e.g. canopy  
244 cavities on oak, pine and spruce, Supplementary Materials: Figure S2, Table S5).

245 Elevation had an overall negative effect on microhabitat occurrence, except for trunk cavities,  
246 lichens and forks. Conversely, soil pH tended to have a positive effect on microhabitat  
247 occurrence, except for conks of fungi. More interestingly, increasing soil pH had a positive  
248 effect on the accumulation of some microhabitats when coupled with DBH (indicated by a  
249 significant interaction term), but a negative effect on occurrence on living trees (Supplementary  
250 Materials: Table S5). All these significant effects exhibited widely varying levels of magnitude,  
251 and in several cases, the estimates were rather imprecise (Supplementary Materials: Figure  
252 S2, Table S5).

253

254

## 255 **Discussion**

256 Numerous recent studies in a variety of contexts have shown that the number of microhabitats  
257 per tree as well as the occurrence of some microhabitat types increase with tree diameter [11,  
258 14, 16]; these studies also evidenced higher occurrence levels on dead than on living trees  
259 [12, 13]. Our nationwide study based on a large database confirmed these relationships and  
260 extended them to a larger range of tree genera under wider biogeographical conditions.  
261 Indeed, our results include five tree genera for both living and dead trees and eleven genera  
262 when only living trees were considered (Supplementary Materials: Figure S1).

263

### 264 Dead trees bear more microhabitats than living trees

265 Standing dead trees contribute significantly to the supply of microhabitats; overall, they bore  
266 10 to 20% more microhabitats than their living counterparts in our dataset comprising five  
267 genera. Dead trees often bear considerably more microhabitats than living trees when  
268 individual microhabitat types are analysed (e.g. woodpecker feeding holes – Figure 3 – or bark  
269 characteristics). Once dead, standing trees are affected by decomposition processes that  
270 trigger microhabitat genesis [15]. Standing dead trees also constitute privileged foraging  
271 grounds for a number of species [5, 7, 8], including woodpeckers [31, 32]. In particular, insect  
272 larvae or ants that live under the bark of more or less recently dead trees provide a non-  
273 negligible part of some birds' diet [8, 33, 34]. Furthermore, as living trees also bear  
274 microhabitats, it seems logical that many of these would persist when the tree dies and would  
275 continue to evolve, or possibly even condition the presence of other microhabitats linked with  
276 the decaying process [15]. For example, injuries caused by logging, branch break or treefall  
277 could begin to rot and then slowly evolve into decay cavities [5, 35]. These successional  
278 changes are likely to explain why these microhabitats types are more numerous on dead trees.  
279 The only exceptions to this global pattern concerned epiphytes and forks with accumulated  
280 organic matter, which both tend to be more numerous on living trees. Ivy, mosses and lichens

281 are likely to benefit from bark characteristics (e.g. pH, [36]) occurring only on living trees.  
282 Epiphytes, especially slow-growing mosses and lichens, require a relatively stable substrate  
283 to take root and develop [37]. Stability is lost when bark loosens and falls off during tree  
284 senescence, and this could cause epiphytic abundance to decrease. In a nutshell, decaying  
285 processes linked to the tree's death reveal a clear difference between microhabitats that are  
286 linked to decay (i.e. saproxylic microhabitats, sensu [5]) and those that are not – or less so (i.e.  
287 epixylic microhabitats).

288 Nearly all previous studies comparing microhabitat numbers on living and dead trees found  
289 more microhabitats on dead trees (see [17]). However, the difference varies across studies,  
290 from 1.2 times as many microhabitats in Mediterranean forests [16] and twice as many in five  
291 French forests [13] to four times as many on habitat trees in south-western Germany [38]. Our  
292 results ranged from 1.1 to 1.2 times as many microhabitats on dead as on living trees, which  
293 is of a slightly lower order of magnitude than previously reported. This surprising result may be  
294 due to the fact that our study encompassed more species with a lower microhabitat bearing  
295 potential (namely conifers). Yet, even for the same species analysed in previous studies (e.g.  
296 beech), the levels we observed were lower. Since we found only small effects of pH and  
297 elevation, this finding seems to indicate that the difference in magnitude is not due to  
298 biogeographical variation.

299

### 300 Number and occurrence of microhabitats increase with tree diameter

301 We confirmed that both microhabitat number and occurrence increase with tree diameter but,  
302 contrary to expectations ([11-13], but see [14]), tree genus had a limited effect on this  
303 relationship, with only slightly higher microhabitat accumulation levels on broadleaves than on  
304 conifers. Almost all microhabitat types taken individually showed the same increasing trends  
305 with tree DBH, but there were considerable variations in magnitude. Larger (living) trees have  
306 generally lived longer than smaller ones, and are consequently more likely to have suffered

307 more damage during their lifespan due to meteorological events (storms, snowfall), natural  
308 hazards (rockfalls) or use by different tree- and wood-dependent species (woodpeckers,  
309 beetles, fungi, see e.g. [13, 39]). In some studies, doubling tree diameter (from 50 to 100 cm)  
310 has been shown to roughly double the number of tree microhabitats [13, 17, 18], though some  
311 studies have found multiples of up to four [38] or even five times [12] in certain cases. Again,  
312 our results showed magnitudes below the lower end of this range (the multiplication coefficient  
313 ranged from 1.2 to 1.4). This may be because the largest trees in our dataset were undoubtedly  
314 younger than those in the other studies, especially in studies on near-natural or long-  
315 abandoned forests [12, 13]. Indeed, since most of our sites had been (more or less) recently  
316 managed, selective felling may have cause trees with a given diameter to be younger than  
317 their counterparts in primeval forests, where competition levels may be higher and cause  
318 slower growth rates. At the individual microhabitat scale, dead branches were more likely to  
319 occur on large trees than on smaller trees; although this result seems quite obvious, it had  
320 rarely been quantified before. Larger trees have more, but also larger, branches likely to die  
321 from competition with neighbours, especially in broadleaves [40]. Indeed, oak and beech were  
322 the genera that showed the highest large dead branch accumulation rates with diameter in our  
323 analyses, while conifers had almost no large dead branches.

324 Cavity birds and bats are reputed to prefer larger trees for nesting or roosting [41, 42], since  
325 thicker wood surrounding the cavity provides a better buffered and more stable microclimatic  
326 conditions [43]. However, we did not confirm this relationship; the accumulation rates of  
327 woodpecker cavities with tree diameter were very weak and non-significant. The supposed  
328 relationship between tree diameter and woodpecker cavity occurrence seems hard to prove in  
329 the context of temperate European forests, at least with data from censuses comparable to  
330 ours (see [13] at the tree scale, or [44] at the stand scale); more targeted research focusing on  
331 this specific relationship is probably needed [31, 45]. Our results could also be linked to the  
332 non-linear dynamics [11] of this particular microhabitat. Some cavities in living beech can close  
333 back up when they are no longer used [pers. obs. Y.P.], and trees weakened by cavity digging  
334 can break, e.g. [45]. Other microhabitats, for instance conks of fungi, may also show non-linear

335 dynamics linked with specific phenology [46]. In our study, the number and occurrence of  
336 microhabitats also increased with diameter in standing dead trees, sometimes at a higher rate  
337 than for living trees. The longer persistence of large dead trees compared to smaller ones [47]  
338 may combine the effects of increased damage due to hazards and the natural decaying  
339 processes described above. This probably explains the higher accumulation levels we  
340 observed in many cases, especially for saproxylic microhabitats (e.g. rot, feeding holes, trunk  
341 cavities). Once again, the only exception to this rule was the epiphytes: their probability of  
342 occurrence tended to increase with tree diameter but very noisily, both for living and dead  
343 trees. For such epiphytic organisms (ivy, mosses and lichens), larger scale processes and  
344 biogeoclimatic context (e.g. soil fertility, precipitation) is probably more important than  
345 individual tree characteristics [48]. This is suggested by the significant and rather strong effects  
346 of pH and elevation in our analyses (Supplementary Materials, Table S4).

347

#### 348 Limitations and research perspectives

349 Contrary to our expectations, we found a limited effect of biogeoclimatic variables on the  
350 relationship between microhabitats, tree diameter and living status. However, some specific  
351 interactions may exist, especially in the case of epiphytes [48], but that could not be evidenced  
352 by our approach. In addition, it was rather difficult to disentangle the effects of tree genus from  
353 those of the biogeoclimatic variables, since the distribution of most tree genera is driven largely  
354 by climate – apart from beech, and more marginally pine, which occur over broad bioclimatic  
355 gradients. However, even when we analysed beech and pine separately, we did not find any  
356 effect of soil pH or elevation on the number of microhabitats, and only slight effects on  
357 accumulation levels with diameter. These results need to be confirmed by further analyses  
358 with larger and more carefully controlled biogeographical gradients.

359 Our data from forest reserves potentially reflect a larger anthropogenic gradient than classical  
360 managed forests. Some of the reserves had not been harvested for several decades and  
361 exhibited characteristics of over-mature forests (see e.g. [20], who analysed some of the  
362 reserves included in this paper). On the other hand, their overall structure reflected relatively

363 recent management abandonment – if any – since the reserves were marked by probable  
364 intensive use or previous harvesting over the past centuries, as is characteristic of western  
365 European forests [49]. This is testified to in the dataset we analysed by the relatively rare  
366 occurrence of dead standing trees, in particular those with a large diameter: standing dead  
367 trees represented a mere 10% of the total dataset and very large individuals (DBH > 67.5cm)  
368 only 1% (Table 2). As a consequence, despite the fact that we worked on an extended  
369 management gradient ranging from managed forests to unmanaged strict reserves, some of  
370 the elements characteristic of old-growth and over-mature forests were still lacking, especially  
371 large dead trees [50]. This truncated the relationships for the investigated set of microhabitats  
372 and made them imprecise for the larger diameter categories. Further research on the last  
373 remnant of old-growth primeval forests in Europe [51, 52] is therefore needed to bridge this  
374 gap and better understand microhabitat dynamics over the whole lifespan of the tree.

375 Compared to recent developments [5, 21], the microhabitat typology we used (Table 1) seems  
376 rather coarse or imprecise. This may explain why we were not able to confirm some of the  
377 effects mentioned in the literature; different microhabitats from a given group may have  
378 different requirements and dynamics (e.g. cavities dug by the black woodpecker vs. other  
379 woodpecker species). On the other hand, our descriptions allowed us to have enough  
380 occurrences in each type to analyse the combined effects of diameter and genus for almost all  
381 the microhabitat types in the typology. Our approach can be viewed as a compromise between  
382 providing the necessary sample size for statistical analyses and the degree of refinement in  
383 typology. The current developments mentioned above [5] will certainly help to homogenize  
384 data in the near future and to build larger, shared databases on common, comparable grounds.

385 Despite a training session prior to the inventories, observer effects cannot be totally ruled-out.  
386 Our censuses were mostly performed by non-specialists [22], contrary to the scientific studies  
387 previously published, and this may have led to the relatively low magnitudes observed, with  
388 the hypothesis that detection error is higher on one status (either dead or living trees) or one

389 type of tree (e.g. small trees, which can be overlooked to the benefit of larger individuals). Such  
390 issues remain to be explored.

391 Finally, our models assumed – unrealistically as it turns out – that microhabitat number would  
392 increase exponentially with diameter. In fact, recent studies, as well as ecological theory (e.g.  
393 species-area relationship), tend to show a saturated (e.g. logarithmic or sigmoid) relationship  
394 between microhabitats and diameter. Models allowing for different link functions – probably  
395 within a Bayesian framework – will need to be tested to see whether they perform better than  
396 the ones used here (see e.g. [11]).

397

#### 398 Implications for forest management and biodiversity conservation

399 Large old trees are considered keystone small natural features in forest and agro-pastoral  
400 landscapes because of their disproportionate importance for biodiversity relative to their size  
401 [3]. This role for biodiversity is further enhanced by the ‘smaller’ natural features –  
402 microhabitats – they bear [7]. In our large-scale analysis, we confirmed and extended results  
403 previously observed only locally: most microhabitats occur on large trees, and even more on  
404 dead ones than on living ones. This relationship seems true for several tree genera included  
405 in this analysis, and across a large gradient of ecological conditions, with minor variations in  
406 accumulation rates with soil pH and elevation. As a consequence, conserving and recruiting  
407 large living and dead trees in daily forest management will enhance structural heterogeneity  
408 at the stand scale [6, 53], and favour a variety of tree-borne microhabitats, which could further  
409 help to better conserve specific forest biodiversity [5, 54]. Even though the diameter effect  
410 seems consistent across different conditions, we recommend promoting a variety of large trees  
411 of various species as this may further increase the positive effect on biodiversity [7]. Indeed,  
412 the succession dynamics and formation rate of microhabitats may vary with tree species [11,  
413 13]. The successional patterns and long-term dynamics of microhabitats remain largely  
414 unknown [11] and long-term monitoring at both tree and stand scales are needed to better  
415 understand their dynamics and the underlying processes at play [5]. Ultimately, such



416 knowledge will provide robust scientific grounds on which to base biodiversity preservation  
417 recommendations for forest managers.

418

## 419 **Acknowledgements**

420 We are in debt to the reserve and forest managers who fed the database and made this study  
421 possible. Without their commitment and implication on a daily basis, our results would not have  
422 been achievable. In addition, we thank C. Bennemann for her work on GIS data extraction, C.  
423 Puverel and R. Andrade for their invaluable help with colour issues and other subtleties of  
424 ggplot2, V. Moore for language review and two anonymous reviewers for constructive  
425 comments. The data analysed here is issued from the “Protocole de Suivi Des Réserves  
426 Forestières” (PSDRF), ONF-RNF.

427

## 428 **References cited**

- 429 1. Hunter ML, Acuña V, Bauer DM, Bell KP, Calhoun AJK, Felipe-Lucia MR, et al. Conserving  
430 small natural features with large ecological roles: A synthetic overview. *Biol Conserv.* 2017;211:88-95.  
431 doi: 10.1016/j.biocon.2016.12.020.
- 432 2. Bauer DM, Bell KP, Nelson EJ, Calhoun AJK. Managing small natural features: A synthesis of  
433 economic issues and emergent opportunities. *Biol Conserv.* 2017;211:80-7. doi:  
434 10.1016/j.biocon.2017.01.001.
- 435 3. Lindenmayer DB. Conserving large old trees as small natural features. *Biol Conserv.*  
436 2017;211:51-9. doi: 10.1016/j.biocon.2016.11.012.
- 437 4. Lindenmayer DB, Laurance WF, Franklin JF. Global decline in large old trees. *Science.*  
438 2012;335:1305-6. doi: 10.1126/science.1231070.
- 439 5. Larrieu L, Paillet Y, Winter S, Bütler R, Kraus D, Krumm F, et al. Tree related microhabitats in  
440 temperate and Mediterranean European forests: A hierarchical typology for inventory standardization.  
441 *Ecol Indic.* 2018;84(April 2017):194-207. doi: 10.1016/j.ecolind.2017.08.051.
- 442 6. Paillet Y, Archaux F, Boulanger V, Debaive N, Fuhr M, Gilg O, et al. Snags and large trees drive  
443 higher tree microhabitat densities in strict forest reserves. *For Ecol Manag.* 2017;389:176-86. doi:  
444 10.1016/j.foreco.2016.12.014.
- 445 7. Paillet Y, Archaux F, du Puy S, Bouget C, Boulanger V, Debaive N, et al. The indicator side of  
446 tree microhabitats: a multi-taxon approach based on bats, birds and saproxylic beetles. *J Appl Ecol.*  
447 2018;(April):0-1. doi: 10.1111/1365-2664.13181.
- 448 8. Regnery B, Couvet D, Kubarek L, Julien JF, Kerbiriou C. Tree microhabitats as indicators of bird  
449 and bat communities in Mediterranean forests. *Ecol Indic.* 2013;34:221-30.
- 450 9. Bütler R, Lachat T, Larrieu L, Paillet Y. Habitat trees: key elements for forest biodiversity. In:  
451 Kraus D, Krumm F, editors. *Integrative approaches as an opportunity for the conservation of forest*  
452 *biodiversity.* Freiburg, DEU: European Forest Institute; 2013. p. 84-91.
- 453 10. Stokland JN, Siitonen J, Jonsson BG. *Biodiversity in dead wood.* Cambridge, UK: University  
454 Press; 2012.
- 455 11. Courbaud B, Pupin C, Letort A, Cabanettes A, Larrieu L, Börger L. Modelling the probability of  
456 microhabitat formation on trees using cross-sectional data. *Meth Ecol Evol.* 2017;8(10):1347-59. doi:  
457 10.1111/2041-210x.12773.

- 458 12. Larrieu L, Cabanettes A. Species, live status, and diameter are important tree features for  
459 diversity and abundance of tree microhabitats in subnatural montane beech-fir forests. *Can J For Res.*  
460 2012;42(8):1433-45.
- 461 13. Vuidot A, Paillet Y, Archaux F, Gosselin F. Influence of tree characteristics and forest  
462 management on tree microhabitats. *Biol Conserv.* 2011;144(1):441-50. doi:  
463 10.1016/j.biocon.2010.09.030.
- 464 14. Winter S, Höfler J, Michel AK, Böck A, Ankerst DP. Association of tree and plot characteristics  
465 with microhabitat formation in European beech and Douglas-fir forests. *European Journal of Forest*  
466 *Research.* 2015;134(2):335-47. doi: 10.1007/s10342-014-0855-x.
- 467 15. Siitonen J. Microhabitats. In: Stokland JN, Siitonen J, Jonsson BG, editors. *Biodiversity in dead*  
468 *wood.* New York, USA: Cambridge University Press; 2012. p. 150-82.
- 469 16. Regnery B, Paillet Y, Couvet D, Kerbiriou C. Which factors influence the occurrence and density  
470 of tree microhabitats in Mediterranean oak forests? *For Ecol Manag.* 2013;295:118-25.
- 471 17. Großmann J, Schultze J, Bauhus J, Pyttel P. Predictors of Microhabitat Frequency and Diversity  
472 in Mixed Mountain Forests in South-Western Germany. *Forests.* 2018;9(3):104. doi: 10.3390/f9030104.
- 473 18. Winter S, Möller GC. Microhabitats in lowland beech forests as monitoring tool for nature  
474 conservation. *For Ecol Manag.* 2008;255(3-4):1251-61.
- 475 19. Kraus D, Schuck A, Bebi P, Blaschke M, Bütler R, Flade M, et al. Spatially explicit database of  
476 tree related microhabitats (TreMs). Version 1.2. ed. GBIF.org: Integrate+ project, Institut National de la  
477 Recherche Agronomique (INRA); 2017.
- 478 20. Paillet Y, Pernot C, Boulanger V, Debaive N, Fuhr M, Gilg O, et al. Quantifying the recovery of  
479 old-growth attributes in forest reserves: A first reference for France. *For Ecol Manag.* 2015;346:51-64.  
480 doi: 10.1016/j.foreco.2015.02.037.
- 481 21. Kraus D, Bütler R, Krumm F, Lachat T, Larrieu L, Mergner U, et al. Catalogue of tree  
482 microhabitats – Reference field list. Integrate+ Technical Paper 16p. 2016:16-. doi:  
483 10.13140/RG.2.1.1500.6483.
- 484 22. Paillet Y, Coutadeur P, Vuidot A, Archaux F, Gosselin F. Strong observer effect on tree  
485 microhabitats inventories: A case study in a French lowland forest. *Ecol Indic.* 2015;49:14-23. doi:  
486 10.1016/j.ecolind.2014.08.023.
- 487 23. Fick SE, Hijmans RJ. WorldClim 2: new 1-km spatial resolution climate surfaces for global land  
488 areas. *International Journal of Climatology.* 2017;37(12):4302-15. doi: 10.1002/joc.5086.
- 489 24. Gégout J-C. Validation des bio-indicateurs floristiques pour une surveillance de l'état nutritionnel  
490 des sols forestiers français à partir des données de l'Inventaire forestier national - Rapport final.,  
491 Convention ADEME/IFN/ENGREF n° 0562C0029, 2008,.
- 492 25. Zuur AF, Ieno EN, Elphick CS. A protocol for data exploration to avoid common statistical  
493 problems. *Meth Ecol Evol.* 2010;1(1):3-14. doi: 10.1111/j.2041-210X.2009.00001.x. PubMed PMID:  
494 WOS:000288913700002.
- 495 26. Magnusson A, Skaug HJ, Nielsen A, Berg CW, Kristensen K, Maechler M, et al. *glmmTMB:*  
496 *Generalized Linear Mixed Models using Template Model Builder.* R package version 0.1.3. ed2017.
- 497 27. Lenth R. *emmeans: Estimated Marginal Means, aka Least-Squares Means.* R package version  
498 1.1. ed2018.
- 499 28. Sellers KF, Morris DS. Underdispersion models: Models that are “under the radar”.  
500 *Communications in Statistics - Theory and Methods.* 2017;46(24):12075-86. doi:  
501 10.1080/03610926.2017.1291976.
- 502 29. Barbier S, Chevalier R, Loussot P, Bergès L, Gosselin F. Improving biodiversity indicators of  
503 sustainable forest management: Tree genus abundance rather than tree genus richness and dominance  
504 for understory vegetation in French lowland oak hornbeam forests. *For Ecol Manag.* 2009;258:S176-  
505 S86. doi: 10.1016/j.foreco.2009.09.004. PubMed PMID: ISI:000273140300019.
- 506 30. R Core Team. *R: A language and environment for statistical computing.* Vienna, Austria: R  
507 Foundation for Statistical Computing; 2017.
- 508 31. Cockle KL, Martin K, Wesolowski T. Woodpeckers, decay, and the future of cavity-nesting  
509 vertebrate communities worldwide. *Frontiers in Ecology and the Environment.* 2011;9(7):377-82. doi:  
510 10.1890/110013.
- 511 32. Jackson JA, Jackson BJS. Ecological relationships between fungi and woodpecker cavity sites.  
512 *Condor.* 2004;106(1):37-49.
- 513 33. Laiolo P, Rolando A, Valsania V. Responses of birds to the natural re-establishment of  
514 wilderness in montane beechwoods of North-western Italy. *Acta Oecol.* 2004;25(1-2):129-36. doi:  
515 10.1016/j.actao.2003.12.003.
- 516 34. Zarnowitz JE, Manuwal DA. The effects of forest management on cavity-nesting birds in  
517 northwestern Washington. *J Wildl Manag.* 1985;49(1):255-63.

- 518 35. Goux N, Brustel H. Emergence trap, a new method to survey *Limoniscus violaceus* (Coleoptera:  
519 Elateridae) from hollow trees. *Biodivers Conserv.* 2012;21(2):421-36. doi: 10.1007/s10531-011-0190-1.  
520 36. Mežaka A, Brumelis G, Piterans A. Tree and stand-scale factors affecting richness and  
521 composition of epiphytic bryophytes and lichens in deciduous woodland key habitats. *Biodivers Conserv.*  
522 2012;21(12):3221-41. doi: 10.1007/s10531-012-0361-8.  
523 37. Ódor P, Király I, Tinya F, Bortignon F, Nascimbene J. Reprint of: Patterns and drivers of species  
524 composition of epiphytic bryophytes and lichens in managed temperate forests. *For Ecol Manag.*  
525 2014;321:42-51. doi: 10.1016/j.foreco.2014.01.035.  
526 38. Johann F, Schaich H. Land ownership affects diversity and abundance of tree microhabitats in  
527 deciduous temperate forests. *For Ecol Manag.* 2016;380:70-81. doi: 10.1016/j.foreco.2016.08.037.  
528 39. Bobiec A. Living stands and dead wood in the Białowieża forest: Suggestions for restoration  
529 management. *For Ecol Manag.* 2002;165(1-3):125-40.  
530 40. Bouget C, Brin A, Brustel H. Exploring the "last biotic frontier": Are temperate forest canopies  
531 special for saproxylic beetles? *For Ecol Manag.* 2011;261(2):211-20.  
532 41. Remm J, Lõhmus A. Tree cavities in forests - The broad distribution pattern of a keystone  
533 structure for biodiversity. *For Ecol Manag.* 2011;262(4):579-85.  
534 42. Tillon L, Bresso K, Aulagnier S. Tree selection by roosting bats in a European temperate lowland  
535 sub-Atlantic forest. *Mammalia.* 2016;80(3):271-9. doi: 10.1515/mammalia-2014-0095.  
536 43. Scheffers BR, Edwards DP, Diesmos A, Williams SE, Evans TA. Microhabitats reduce animal's  
537 exposure to climate extremes. *Global Change Biology.* 2014;20(2):495-503. doi: 10.1111/gcb.12439.  
538 44. Edworthy AB, Martin K. Persistence of tree cavities used by cavity-nesting vertebrates declines  
539 in harvested forests. *J Wildl Manag.* 2013;77(4):770-6. doi: 10.1002/jwmg.526.  
540 45. Wesolowski T. "Lifespan" of woodpecker-made holes in a primeval temperate forest: A thirty  
541 year study. *For Ecol Manag.* 2011;262(9):1846-52. doi: 10.1016/j.foreco.2011.08.001.  
542 46. Halme P, Kotiaho JS. The importance of timing and number of surveys in fungal biodiversity  
543 research. *Biodivers Conserv.* 2012;21(1):205-19.  
544 47. Aakala T, Kuuluvainen T, Gauthier S, De Grandpré L. Standing dead trees and their decay-  
545 class dynamics in the northeastern boreal old-growth forests of Quebec. *For Ecol Manag.* 2008;255(3-  
546 4):410-20. doi: 10.1016/j.foreco.2007.09.008.  
547 48. Ding Y, Liu G, Zang R, Zhang J, Lu X, Huang J. Distribution of vascular epiphytes along a  
548 tropical elevational gradient: Disentangling abiotic and biotic determinants. *Scientific Reports.* 2016;6.  
549 doi: 10.1038/srep19706.  
550 49. Parviainen J. Virgin and natural forests in the temperate zone of Europe. *For Snow Landsc Res.*  
551 2005;79(1-2):9-18.  
552 50. Christensen M, Hahn K, Mountford EP, Odor P, Standovar T, Rozenbergar D, et al. Dead wood  
553 in European beech (*Fagus sylvatica*) forest reserves. *For Ecol Manag.* 2005;210(1-3):267-82. PubMed  
554 PMID: ISI:000229165500020.  
555 51. Sabatini FM, Burrascano S, Keeton WS, Levers C, Lindner M, Pötzschner F, et al. Where are  
556 Europe's last primary forests? *Divers Distrib.* 2018. doi: 10.1111/ddi.12778.  
557 52. Kozák D, Mikoláš M, Svitok M, Bače R, Paillet Y, Larrieu L, et al. Profiles of tree-related  
558 microhabitats in European primary beech-dominated forests. *For Ecol Manag.* 2018;429:363-74.  
559 53. Bauhus J, Puettmann K, Messier C. Silviculture for old-growth attributes. *For Ecol Manag.*  
560 2009;258(4):525-37. doi: 10.1016/j.foreco.2009.01.053.  
561 54. Gossner MM, Getzin S, Lange M, Pašalić E, Türke M, Wiegand K, et al. The importance of  
562 heterogeneity revisited from a multiscale and multitaxa approach. *Biol Conserv.* 2013;166:212-20. doi:  
563 10.1016/j.biocon.2013.06.033.

564

565 Figure 1: Location of the study sites

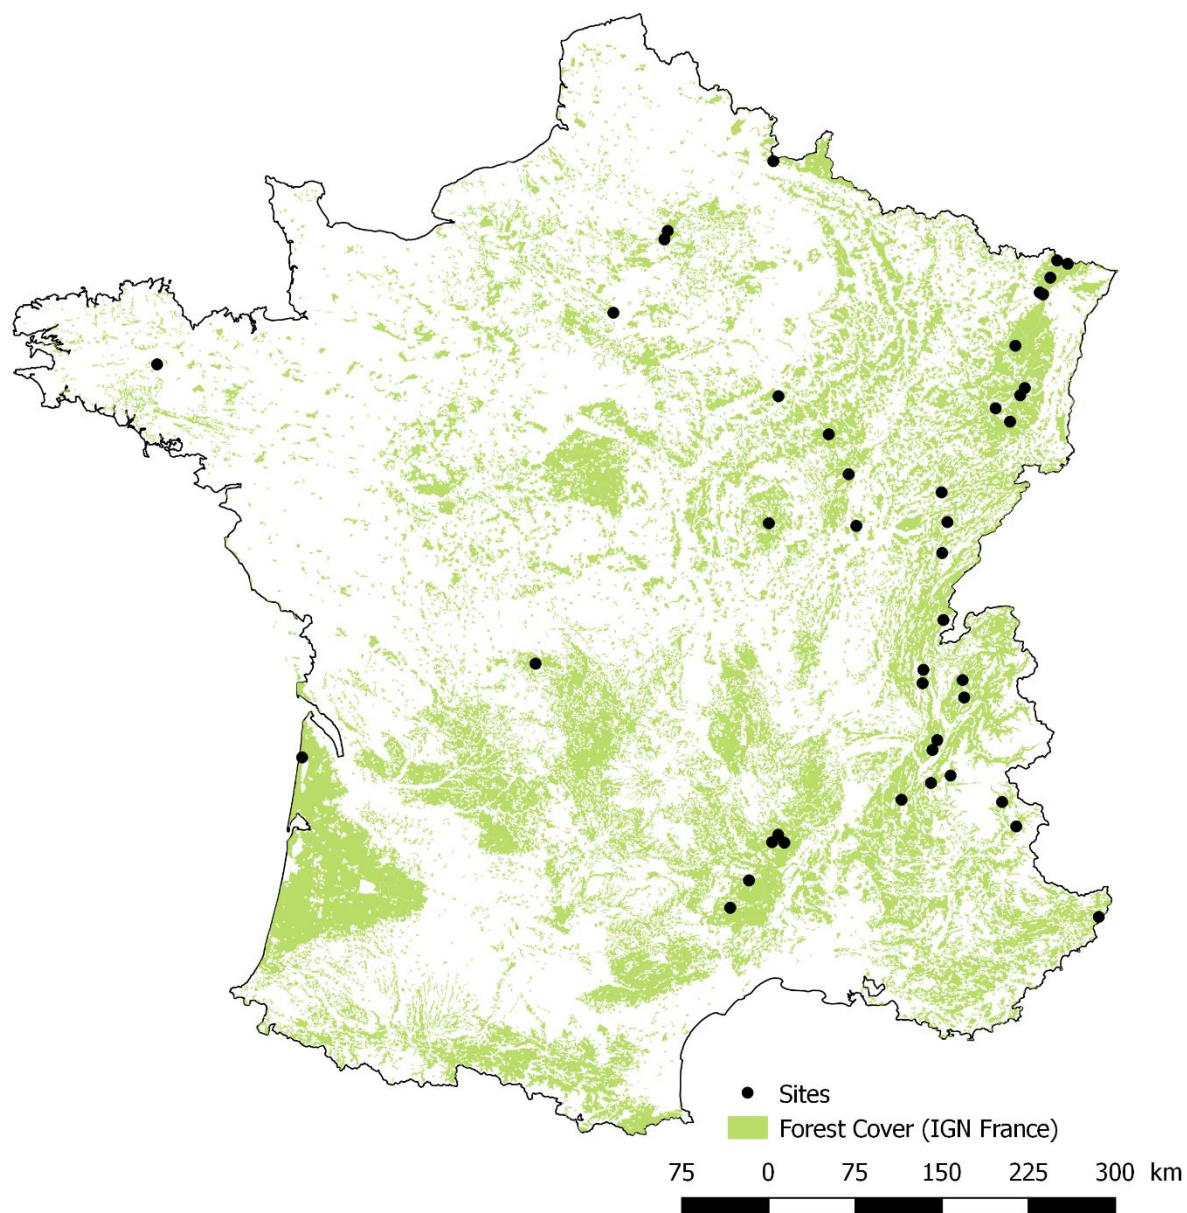

566  
567

568 Figure 2: Relationship between number of microhabitats (N microhabitats per tree) and  
569 Diameter at Breast Height (DBH, cm) by genera (beech: *Fagus sylvatica*; fir: *Abies alba*; oak:  
570 *Quercus* spp., pine: *Pinus* spp. and spruce: *Picea abies*) and living status (living vs. dead  
571 standing trees). Lines represent estimates from generalized mixed effect models with a  
572 Poisson error distribution and plot nested in site as a random effect. Ribbons show the 95%  
573 confidence intervals of the mean. For this representation, pH and elevation were held constant  
574 (mean values in our data set).

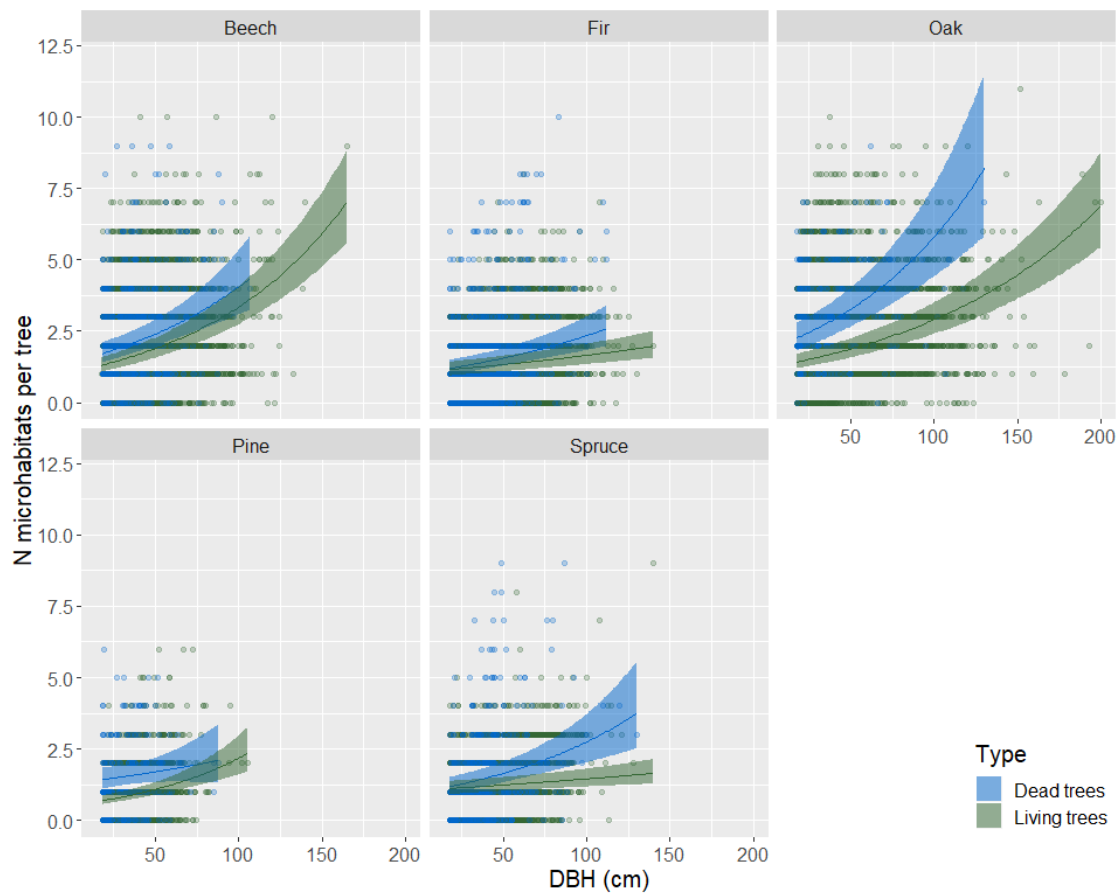

575

576

577 Figure 3: Relationship between occurrence of woodpecker feeding holes and Diameter at  
578 Breast Height (DBH, cm) by genera (beech: *Fagus sylvatica*; fir: *Abies alba*; oak: *Quercus* spp.,  
579 pine: *Pinus* spp. and spruce: *Picea abies*) and living status (living vs. dead standing trees).  
580 Lines represent estimates from generalized mixed effect models with a binomial error  
581 distribution. Ribbons show the 95% confidence interval of the mean. For this representation,  
582 pH and elevation were held constant. See Supplementary materials, Figure S2, for all  
583 microhabitat types.

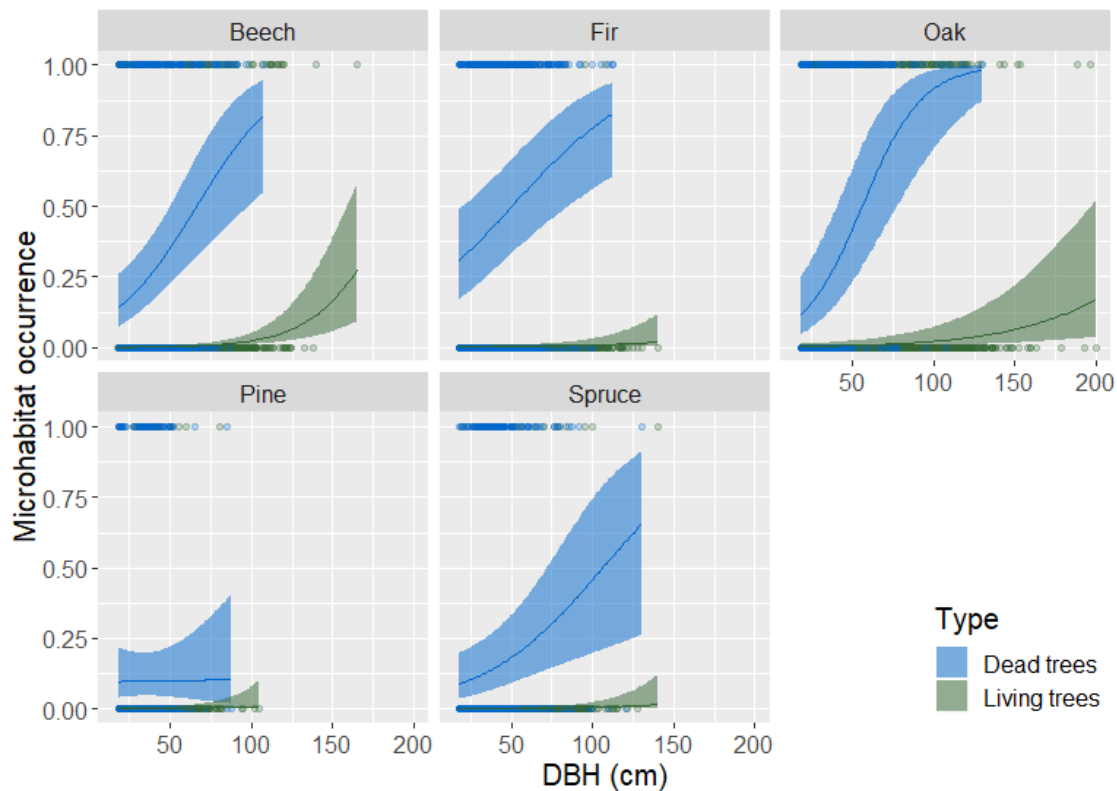

584

585 Table 1: Microhabitat typology

586

| Microhabitat              | Description                                                                                   | Microhabitat occurrence (%; n=22307) |
|---------------------------|-----------------------------------------------------------------------------------------------|--------------------------------------|
| Base Cavity               | Non-woodpecker cavity located at a height < 1.3m, large enough to host small mammals          | 9.2                                  |
| Trunk Cavity              | Non-woodpecker cavity located at a height comprised between 1.3m and the first main branch    | 4.5                                  |
| Canopy cavity             | Non-woodpecker cavity located on canopy branches (unhealed)                                   | 1.0                                  |
| Woodpecker cavity         | Woodpecker nesting cavity, minimum diameter 2cm                                               | 1.4                                  |
| Crack                     | Crack in the wood with a width >1cm and deep enough to host bat species                       | 3.1                                  |
| Woodpecker feeding hole   | Feeding hole dug by a woodpecker                                                              | 4.6                                  |
| Rot                       | Presence of wood rot                                                                          | 3.3                                  |
| Injury                    | Fresh injury, minimum diameter 10cm.                                                          | 12.1                                 |
| Conk of fungi             | Conk of a perennial polypore                                                                  | 4.0                                  |
| Bark characteristic       | Bark loosened affecting >50% of the surface of a given part of the tree (base, trunk, canopy) | 3.1                                  |
| Bryophyte (>50)           |                                                                                               | 53.5                                 |
| Lichen (>50)              | Epiphytes with a cover >50% of a given part of the tree (base, trunk, canopy)                 | 31.9                                 |
| Ivy (>50)                 |                                                                                               | 7.9                                  |
| Small branches (5-10cm)   | Dead branches with a diameter comprised between 5 and 10cm and a length > 1m                  | 28.4                                 |
| Medium branches (10-30cm) | Dead branches with a diameter comprised between 10 and 30cm and a length > 1m                 | 13.3                                 |
| Large branches (>30cm)    | Dead branches with a diameter > 30cm and a length > 1m                                        | 1.5                                  |
| Crown skeleton            | Noted when the cumulative number of small, medium and large branches was > 10                 | 2.3                                  |
| Fork                      | Fork with suspected presence of organic matter or rainwater                                   | 12.8                                 |
| Broken stem               | Broken or dry main stem                                                                       | 7.1                                  |

587 Table 2: Distribution of the data by genus and Diameter at Breast Height (DBH) classes. Genera in grey were excluded from the main analyses  
588 due to an insufficient number of occurrences of dead trees; in this case, only living trees were analysed (see Supplementary Materials: Figure  
589 S1). ash: *Fraxinus excelsior*; beech: *Fagus sylvatica*; chestnut: *Castanea sativa*; fir: *Abies alba*; hornbeam: *Carpinus betulus*; larch: *Larix decidua*;  
590 maple: *Acer* spp., oak: *Quercus* spp.; pine: *Pinus* spp.; poplar: *Populus* spp.; and spruce: *Picea abies*.

| Genus    | Living trees              |                        |                          |                  |       | Dead trees            |                        |                          |                  |       |
|----------|---------------------------|------------------------|--------------------------|------------------|-------|-----------------------|------------------------|--------------------------|------------------|-------|
|          | 17.5 < D<br>BH ≤ 30<br>cm | 30 ≤ DBH < 47<br>.5 cm | 47.5 ≤ DBH < 6<br>7.5 cm | DBH ≥ 67.5<br>cm | Total | 17.5 < DBH<br>≤ 30 cm | 30 ≤ DBH < 47<br>.5 cm | 47.5 ≤ DBH < 6<br>7.5 cm | DBH ≥ 67.5<br>cm | Total |
| Ash      | 300                       | 292                    | 93                       | 25               | 710   | 25                    | 11                     | 3                        | 0                | 39    |
| Beech    | 1743                      | 3382                   | 1811                     | 600              | 7536  | 117                   | 213                    | 100                      | 37               | 467   |
| Chestnut | 71                        | 154                    | 87                       | 26               | 338   | 42                    | 14                     | 4                        | 3                | 63    |
| Fir      | 807                       | 1440                   | 1339                     | 698              | 4284  | 126                   | 348                    | 155                      | 54               | 683   |
| Hornbeam | 223                       | 156                    | 30                       | 2                | 411   | 8                     | 4                      | 1                        | 0                | 13    |
| Larch    | 114                       | 312                    | 243                      | 79               | 748   | 6                     | 11                     | 2                        | 0                | 19    |
| Maple    | 375                       | 472                    | 140                      | 19               | 1006  | 21                    | 10                     | 3                        | 0                | 34    |
| Oak      | 1259                      | 1549                   | 1043                     | 925              | 4776  | 79                    | 89                     | 38                       | 33               | 239   |
| Pine     | 363                       | 783                    | 273                      | 33               | 1452  | 83                    | 115                    | 25                       | 5                | 228   |
| Poplar   | 66                        | 124                    | 50                       | 18               | 258   | 12                    | 11                     | 6                        | 2                | 31    |
| Spruce   | 540                       | 850                    | 544                      | 330              | 2264  | 87                    | 198                    | 70                       | 26               | 381   |
| Total    | 5861                      | 9514                   | 5653                     | 2755             | 23783 | 606                   | 1024                   | 407                      | 160              | 2197  |

591



592 Table 3: Percentage of difference in number of microhabitats between living and dead trees  
 593 for a mean Diameter at Breast Height (DBH = 44 cm) calculated as [(Microhabitats dead trees  
 594 – Microhabitats living trees) / (Microhabitats dead trees + Microhabitats living trees)] x 100. An  
 595 \* indicates a significant (p<0.05) difference based on post-hoc Tukey tests for a mean DBH.  
 596 Values close to -100 correspond to cases where microhabitats were quasi-absent on dead  
 597 trees (resp. 100 for living trees). Figures in brackets are absolute values for dead and living  
 598 trees respectively. Beech: *Fagus sylvatica*; fir: *Abies alba*; oak: *Quercus* spp.; pine: *Pinus* spp.;  
 599 and spruce: *Picea abies*.

| Microhabitats            | Beech                   | Fir                      | Oak                     | Pine                    | Spruce                  |
|--------------------------|-------------------------|--------------------------|-------------------------|-------------------------|-------------------------|
| All                      | 14.9*<br>[2.27-1.681]   | 12.7*<br>[1.649-1.278]   | 21.5*<br>[2.789-1.804]  | 14.8<br>[1.511-1.121]   | 11.4*<br>[1.464-1.164]  |
| Base cavities            | 18.6<br>[0.057-0.039]   | 29.7<br>[0.022-0.012]    | 4.6<br>[0.02-0.018]     | 61.3<br>[0.008-0.002]   | -32.9<br>[0.015-0.03]   |
| Trunk cavities           | 41.4*<br>[0.072-0.03]   | 71.4<br>[0.02-0.003]     | 49.3*<br>[0.049-0.017]  | 79.9*<br>[0.021-0.002]  | 86.8*<br>[0.01-0.001]   |
| Canopy cavities          | -44.9<br>[0.001-0.001]  | -10.5<br>[<0.001-<0.001] | 10.0<br>[0.002-0.002]   | -100<br>[<0.001-0.001]  | 100<br>[<0.001-<0.001]  |
| Woodpecker cavities      | 77.9*<br>[0.029-0.004]  | 39.7<br>[0.006-0.002]    | 64.6*<br>[0.018-0.004]  | 63.7<br>[0.015-0.003]   | 26.3<br>[0.003-0.002]   |
| Cracks                   | 42.9*<br>[0.035-0.014]  | 41.4<br>[0.01-0.004]     | 82.8*<br>[0.039-0.004]  | -66.2<br>[0.001-0.004]  | 54.4<br>[0.016-0.005]   |
| Woodpecker feeding holes | 97.5*<br>[0.285-0.004]  | 98.6*<br>[0.362-0.003]   | 95.8*<br>[0.362-0.008]  | 95.6*<br>[0.13-0.003]   | 97.9*<br>[0.184-0.002]  |
| Rot                      | 45.9*<br>[0.039-0.014]  | 22.3<br>[0.013-0.008]    | 90.3*<br>[0.138-0.007]  | 82.2*<br>[0.013-0.001]  | 80.3*<br>[0.027-0.003]  |
| Injuries                 | -67.4*<br>[0.015-0.075] | -82.8*<br>[0.006-0.06]   | -62.5*<br>[0.011-0.049] | -74.5*<br>[0.004-0.028] | -89.3*<br>[0.005-0.086] |
| Conks of fungi           | 96.1*<br>[0.37-0.007]   | 98.0*<br>[0.271-0.003]   | 86.9*<br>[0.076-0.005]  | 94.1*<br>[0.062-0.002]  | 96.2*<br>[0.151-0.003]  |
| Bark characteristics     | 92.1*<br>[0.061-0.003]  | 94.0*<br>[0.049-0.002]   | 98.6*<br>[0.262-0.002]  | 96.9*<br>[0.056-0.001]  | 98.5*<br>[0.106-0.001]  |
| Moss cover >50%          | -18.1*<br>[0.458-0.66]  | -37.7*<br>[0.154-0.341]  | -56.6*<br>[0.225-0.809] | 55.0<br>[0.105-0.03]    | 6.0<br>[0.092-0.082]    |
| Lichen cover >50%        | -61.1*<br>[0.029-0.121] | -71.9*<br>[0.035-0.216]  | -29.1<br>[0.074-0.135]  | -32.7<br>[0.04-0.08]    | -75.8*<br>[0.011-0.081] |
| Ivy cover >50%           | -25.6<br>[0.001-0.002]  | -54.2<br>[<0.001-0.002]  | -4.5<br>[0.003-0.004]   | 25.5<br>[0.002-0.001]   | -30.9<br>[0.002-0.003]  |
| Small branches           | -82.7*<br>[0.015-0.153] | -52.8*<br>[0.031-0.1]    | -88.1*<br>[0.02-0.318]  | -84.6*<br>[0.031-0.371] | -46.7<br>[0.02-0.056]   |
| Medium branches          | -58.8*<br>[0.012-0.045] | 81.7*<br>[0.052-0.005]   | -59.5*<br>[0.043-0.17]  | -48.9<br>[0.037-0.106]  | -39.4<br>[0.002-0.004]  |
| Large branches           | 33.7<br>[0.003-0.001]   | 42.8<br>[<0.001-<0.001]  | -52.8<br>[0.002-0.006]  | 54.2<br>[0.008-0.002]   | -100<br>[<0.001-<0.001] |
| Crown skeleton           | 98.3*<br>[0.003-<0.001] | 74.6<br>[<0.001-<0.001]  | 97.4*<br>[0.003-<0.001] | 85.3*<br>[0.006-<0.001] | 91.2*<br>[0.017-0.001]  |
| Forks                    | -94.3*<br>[0.002-0.075] | -72.4*<br>[0.003-0.021]  | -48.9<br>[0.02-0.059]   | -82.9<br>[0.003-0.032]  | -67.9*<br>[0.004-0.019] |
| Broken stem              | 12.1<br>[0.029-0.023]   | 0.4<br>[0.033-0.032]     | -1.6<br>[0.021-0.021]   | -38.8<br>[0.012-0.028]  | -9.8<br>[0.021-0.026]   |

600

601 **Supplementary materials**

602 Table S1: Distribution of plots and trees across the study sites (see map, Figure 1)

| Site                                      | Number of plots | Number of trees |
|-------------------------------------------|-----------------|-----------------|
| Artoise                                   | 59              | 322             |
| Assan                                     | 82              | 633             |
| Aulp du Seuil                             | 41              | 553             |
| Bannes                                    | 143             | 630             |
| Beaux Monts                               | 81              | 525             |
| Bourg d'Oisans Vieille Morte              | 7               | 10              |
| Butte de Malvrans                         | 37              | 154             |
| Chaume Charlemagne                        | 65              | 623             |
| Citeaux                                   | 51              | 755             |
| Col du Coq                                | 31              | 222             |
| Combe d'Ire                               | 91              | 629             |
| Dame Blanche                              | 56              | 277             |
| Dunes et Marais d'Hourtin                 | 40              | 147             |
| Foret du Langenberg                       | 39              | 394             |
| Foret Irreguliere de la Petite Pierre Sud | 178             | 1493            |
| Glaciere                                  | 44              | 734             |
| Grand Tanargue                            | 39              | 580             |
| Grands Monts                              | 52              | 281             |
| Griffe au Diable                          | 38              | 124             |
| Haut Tuileau                              | 100             | 599             |
| Haute chaine du Jura                      | 137             | 1686            |
| Hautes Vosges                             | 114             | 1149            |
| Hengstberg                                | 67              | 231             |
| Ile Falcon                                | 1               | 2               |
| Ilots Cevennes                            | 44              | 482             |
| Lutzelhardt                               | 32              | 46              |
| Marais de Lavours                         | 8               | 24              |
| Montaigu                                  | 95              | 998             |
| Nonnenthal                                | 62              | 462             |
| Partias                                   | 2               | 4               |
| Plateau de Combe Noire                    | 65              | 550             |
| Quinquendolle                             | 86              | 431             |
| Ravin de Valbois                          | 104             | 447             |
| Roc de Chere                              | 57              | 1180            |
| Sources de l'Ardeche                      | 28              | 232             |
| Tanet Gazon du Faing                      | 54              | 854             |
| Tetes d'Alpe                              | 95              | 1132            |
| Tourbiere des Charmes                     | 19              | 289             |
| Tourbiere des Dauges                      | 27              | 176             |
| Valat de l'Hort de Dieu                   | 35              | 224             |
| Vercors                                   | 279             | 976             |
| Vernay                                    | 62              | 851             |
| Verrieres                                 | 36              | 196             |

603

604 Table S2: Scaled estimates for number of microhabitat types per tree from a generalised linear  
 605 mixed model with a Poisson error distribution and plot nested in site as a random effect. DBH:  
 606 Diameter at Breast Height; SE: standard error of the mean; p = p value; \*\*\*p<0.001; \*\*p<0.01;  
 607 \*p<0.05. Beech: *Fagus sylvatica*; fir: *Abies alba*; oak: *Quercus* spp.; pine: *Pinus* spp.; and  
 608 spruce: *Picea abies*.

| Parameter                               | Estimate | SE     | p      |     |
|-----------------------------------------|----------|--------|--------|-----|
| Intercept                               | 0.8198   | 0.0954 | <0.001 | *** |
| DBH                                     | 0.2265   | 0.0359 | <0.001 | *** |
| Fir                                     | -0.3196  | 0.0482 | <0.001 | *** |
| Oak                                     | 0.2060   | 0.0502 | <0.001 | *** |
| Pine                                    | -0.4070  | 0.0838 | <0.001 | *** |
| Spruce                                  | -0.4386  | 0.0558 | <0.001 | *** |
| Living status (Living trees)            | -0.3004  | 0.0338 | <0.001 | *** |
| pH                                      | -0.0170  | 0.0506 | 0.7372 | ns  |
| Elevation                               | 0.1136   | 0.0380 | 0.0028 | **  |
| DBH:Fir                                 | -0.0576  | 0.0469 | 0.2193 | ns  |
| DBH:Oak                                 | -0.0112  | 0.0474 | 0.8128 | ns  |
| DBH:Pine                                | -0.1282  | 0.0886 | 0.1478 | ns  |
| DBH:Spruce                              | -0.0525  | 0.0541 | 0.3318 | ns  |
| DBH: Living status (Living trees)       | -0.0098  | 0.0368 | 0.7894 | ns  |
| DBH:pH                                  | 0.0460   | 0.0077 | <0.001 | *** |
| Living status (Living trees):pH         | -0.0508  | 0.0189 | 0.0072 | **  |
| Fir:pH                                  | -0.0362  | 0.0248 | 0.1445 | ns  |
| Oak:pH                                  | 0.0537   | 0.0221 | 0.0153 | *   |
| Pine:pH                                 | 0.0976   | 0.0350 | 0.0053 | **  |
| Spruce:pH                               | -0.0311  | 0.0273 | 0.2553 | ns  |
| Fir:Living status (Living trees)        | 0.0455   | 0.0491 | 0.3534 | ns  |
| Oak:Living status (Living trees)        | -0.1354  | 0.0500 | 0.0068 | **  |
| Pine:Living status (Living trees)       | 0.0017   | 0.0840 | 0.9837 | ns  |
| Spruce:Living status (Living trees)     | 0.0708   | 0.0574 | 0.2173 | ns  |
| DBH:Fir:Living status (Living trees)    | -0.1034  | 0.0491 | 0.0352 | *   |
| DBH:Oak:Living status (Living trees)    | -0.0160  | 0.0484 | 0.7409 | ns  |
| DBH:Pine:Living status (Living trees)   | 0.1964   | 0.0954 | 0.0396 | *   |
| DBH:Spruce:Living status (Living trees) | -0.1154  | 0.0572 | 0.0435 | *   |

609

610 Table S3: Accumulation levels of microhabitats per tree (number of microhabitats and  
 611 occurrence) for a Diameter at Breast Height (DBH) increment from 50 cm to 100 cm issued  
 612 from generalised linear mixed models with Poisson (number) and binomial (occurrence) error  
 613 distributions. Beech: *Fagus sylvatica*; fir: *Abies alba*; oak: *Quercus* spp.; pine: *Pinus* spp.; and  
 614 spruce: *Picea abies*.

| Microhabitats        | Living trees |        |        |        |        | Dead trees |        |        |        |        |
|----------------------|--------------|--------|--------|--------|--------|------------|--------|--------|--------|--------|
|                      | Beech        | Fir    | Oak    | Pine   | Spruce | Beech      | Fir    | Oak    | Pine   | Spruce |
| All                  | 1.173        | 0.261  | 0.999  | 1.641  | 0.212  | 1.608      | 0.919  | 1.802  | 0.732  | 1.006  |
| Base cavities        | 0.176        | 0.064  | 0.052  | 0.427  | 0.026  | 0.345      | 0.063  | 0.061  | -0.004 | 0.181  |
| Trunk cavities       | 0.077        | 0.013  | 0.036  | 0.026  | 0.05   | 0.346      | 0.058  | 0.282  | 0.005  | 0.055  |
| Canopy cavities      | 0.018        | 0.002  | 0.005  | 0.000  | 0.000  | 0.000      | 0.062  | 0.002  | 0.000  | 0.011  |
| Woodp. cavities      | 0.005        | 0.001  | 0.004  | 0.209  | 0.006  | 0.033      | 0.027  | 0.007  | 0.131  | 0.023  |
| Cracks               | 0.028        | 0.001  | 0.057  | 0.007  | 0.012  | 0.077      | -0.004 | 0.01   | -0.001 | -0.003 |
| Woodp. feeding holes | 0.032        | 0.005  | 0.024  | 0.002  | 0.004  | 0.417      | 0.305  | 0.411  | 0.022  | 0.233  |
| Rot                  | 0.011        | 0.003  | 0.033  | 0.042  | 0.001  | 0.234      | 0.007  | 0.267  | 0.039  | -0.019 |
| Injuries             | 0.043        | -0.003 | 0.043  | 0.012  | -0.004 | -0.005     | -0.003 | 0.006  | 0.012  | -0.003 |
| Conks of fungi       | 0.047        | 0.022  | 0.003  | 0.002  | -0.001 | 0.150      | 0.240  | 0.143  | -0.01  | 0.270  |
| Bark characteristics | 0.004        | 0.002  | 0.013  | 0.003  | 0.000  | 0.021      | 0.09   | 0.121  | 0.014  | -0.028 |
| Moss cover >50%      | 0.196        | 0.243  | -0.032 | -0.071 | 0.246  | 0.086      | 0.161  | -0.001 | 0.626  | 0.277  |
| Lichen cover > 50%   | 0.063        | 0.097  | 0.017  | 0.174  | -0.045 | -0.017     | 0.02   | 0.005  | -0.027 | 0.026  |
| Ivy cover >50%       | 0.001        | 0.002  | 0.058  | -0.002 | 0.006  | 0.001      | 0.000  | 0.003  | 0.011  | 0.000  |
| Small branches       | 0.200        | 0.348  | 0.214  | 0.147  | 0.559  | -0.003     | 0.049  | -0.015 | -0.008 | 0.007  |
| Medium branches      | 0.498        | 0.36   | 0.526  | 0.324  | 0.019  | 0.015      | 0.010  | 0.007  | -0.007 | 0.013  |
| Large branches       | 0.049        | 0.003  | 0.012  | 0.081  | 0.000  | 0.021      | 0.006  | 0.000  | 0.011  | 0.000  |
| Crown skeleton       | 0.000        | 0.001  | 0.000  | 0.090  | 0.005  | -0.001     | 0.000  | 0.000  | 0.124  | -0.006 |
| Forks                | 0.279        | 0.050  | 0.309  | 0.152  | -0.012 | -0.001     | 0.049  | 0.001  | -0.001 | 0.048  |
| Broken stem          | 0.012        | -0.021 | -0.003 | -0.017 | -0.01  | 0.116      | 0.024  | 0.052  | -0.025 | 0.052  |

615

616 Table S4: Scaled estimates for number of microhabitat types per tree for beech (*Fagus*  
 617 *sylvatica*) and pine (*Pinus* spp.) from a generalised linear mixed model with a Poisson error  
 618 distribution and plot nested in site as a random effect. DBH: Diameter at Breast Height; SE:  
 619 standard error of the mean. p = p value; \*\*\*p<0.001; \*\*p<0.01; \*p<0.05.

|                                        | Beech    |       |        |     | Pine     |       |        |     |
|----------------------------------------|----------|-------|--------|-----|----------|-------|--------|-----|
|                                        | Estimate | SE    | p      |     | Estimate | SE    | p      |     |
| Intercept                              | 0.759    | 0.097 | <0.001 | *** | 0.285    | 0.186 | 0.126  | ns  |
| DBH                                    | 0.147    | 0.034 | <0.001 | *** | 0.101    | 0.046 | 0.030  | *   |
| Living status (Living trees)           | -0.270   | 0.033 | <0.001 | *** | -0.441   | 0.069 | <0.001 | *** |
| pH                                     | 0.032    | 0.064 | 0.614  | ns  | 0.173    | 0.190 | 0.363  | ns  |
| Elevation                              | -0.030   | 0.060 | 0.617  | ns  | -0.250   | 0.168 | 0.137  | ns  |
| DBH:Living status (Living trees)       | 0.030    | 0.034 | 0.375  | ns  | 0.124    | 0.051 | 0.016  | *   |
| DBH:pH                                 | 0.045    | 0.010 | <0.001 | *** | 0.169    | 0.067 | 0.012  | *   |
| DBH:Elevation                          | -0.007   | 0.009 | 0.477  | ns  | -0.105   | 0.064 | 0.097  | (*) |
| Living status (Living trees):pH        | -0.078   | 0.033 | 0.017  | *   | -0.171   | 0.155 | 0.269  | ns  |
| Living status (Living trees):Elevation | 0.120    | 0.036 | 0.001  | **  | 0.302    | 0.166 | 0.068  | (*) |

620

621 Table S5: Scaled estimates for occurrence of microhabitat types per tree from a generalised linear mixed model with a binomial error distribution  
 622 and plot nested in site as a random effect. DBH: Diameter at Breast Height; SE: standard error of the mean. Beech: *Fagus sylvatica*; fir: *Abies*  
 623 *alba*; oak: *Quercus* spp.; pine: *Pinus* spp.; and spruce: *Picea abies*. p = p value; \*\*\*p<0.001; \*\*p<0.01; \*p<0.05.

|                                         | Base cavities |       |        | Trunk cavities |        |       | Canopy cavities |     |         | Woodpecker cavities |        |     | Cracks   |       |        |     |        |       |        |     |
|-----------------------------------------|---------------|-------|--------|----------------|--------|-------|-----------------|-----|---------|---------------------|--------|-----|----------|-------|--------|-----|--------|-------|--------|-----|
|                                         | Estimate      | SE    | p      | Estimate       | SE     | p     | Estimate        | SE  | p       | Estimate            | SE     | p   | Estimate | SE    | p      |     |        |       |        |     |
| Intercept                               | -2.81         | 0.353 | <0.001 | ***            | -2.562 | 0.266 | <0.001          | *** | -7.499  | 1.281               | <0.001 | *** | -3.513   | 0.324 | <0.001 | *** | -3.306 | 0.324 | <0.001 | *** |
| DBH                                     | 0.85          | 0.207 | <0.001 | ***            | 0.824  | 0.189 | <0.001          | *** | -0.007  | 1.375               | 0.996  | ns  | 0.388    | 0.257 | 0.131  | ns  | 0.449  | 0.217 | 0.039  | *   |
| Fir                                     | -0.99         | 0.344 | 0.004  | **             | -1.319 | 0.304 | <0.001          | *** | -1.223  | 2.008               | 0.543  | ns  | -1.651   | 0.525 | 0.002  | **  | -1.275 | 0.366 | <0.001 | *** |
| Oak                                     | -1.077        | 0.367 | 0.003  | **             | -0.409 | 0.322 | 0.203           | ns  | 1.389   | 1.239               | 0.262  | ns  | -0.477   | 0.453 | 0.292  | ns  | 0.102  | 0.373 | 0.784  | ns  |
| Pine                                    | -2.019        | 0.655 | 0.002  | **             | -1.256 | 0.519 | 0.016           | *   | -11.291 | 16.5                | 0.494  | ns  | -0.669   | 0.674 | 0.321  | ns  | -3.909 | 0.879 | <0.001 | *** |
| Spruce                                  | -1.357        | 0.343 | <0.001 | ***            | -2.06  | 0.419 | <0.001          | *** | -1.502  | 2.208               | 0.496  | ns  | -2.253   | 0.647 | <0.001 | *** | -0.842 | 0.4   | 0.035  | *   |
| Living status (Living trees)            | -0.395        | 0.206 | 0.056  | (*)            | -0.926 | 0.183 | <0.001          | *** | 0.967   | 1.21                | 0.424  | ns  | -2.11    | 0.281 | <0.001 | *** | -0.94  | 0.215 | <0.001 | *** |
| pH                                      | -0.266        | 0.286 | 0.351  | ns             | -0.256 | 0.225 | 0.256           | ns  | 0.969   | 0.756               | 0.2    | ns  | 0.256    | 0.261 | 0.326  | ns  | 0.125  | 0.267 | 0.638  | ns  |
| Elevation                               | 0.255         | 0.219 | 0.244  | ns             | 0.641  | 0.176 | <0.001          | *** | -0.011  | 0.354               | 0.976  | ns  | -0.032   | 0.19  | 0.867  | ns  | 0.174  | 0.191 | 0.361  | ns  |
| DBH:Fir                                 | -0.35         | 0.32  | 0.275  | ns             | -0.372 | 0.28  | 0.184           | ns  | 2.131   | 1.571               | 0.175  | ns  | 0.31     | 0.429 | 0.47   | ns  | -0.641 | 0.392 | 0.102  | ns  |
| DBH:Oak                                 | -0.298        | 0.304 | 0.327  | ns             | 0.125  | 0.265 | 0.636           | ns  | 0.663   | 1.419               | 0.64   | ns  | -0.226   | 0.388 | 0.56   | ns  | -0.306 | 0.321 | 0.341  | ns  |
| DBH:Pine                                | -0.956        | 0.625 | 0.126  | ns             | -0.682 | 0.529 | 0.197           | ns  | -9.992  | 13.3                | 0.454  | ns  | 0.019    | 0.607 | 0.975  | ns  | -1.206 | 0.745 | 0.105  | ns  |
| DBH:Spruce                              | 0.103         | 0.321 | 0.747  | ns             | -0.259 | 0.355 | 0.467           | ns  | 1.65    | 1.579               | 0.296  | ns  | 0.326    | 0.43  | 0.448  | ns  | -0.524 | 0.358 | 0.143  | ns  |
| DBH:Living status (Living trees)        | -0.188        | 0.211 | 0.372  | ns             | -0.373 | 0.195 | 0.055           | (*) | 0.915   | 1.378               | 0.507  | ns  | 0.115    | 0.27  | 0.668  | ns  | -0.028 | 0.222 | 0.9    | ns  |
| DBH:pH                                  | -0.009        | 0.054 | 0.867  | ns             | 0.044  | 0.062 | 0.48            | ns  | -0.146  | 0.163               | 0.372  | ns  | 0.129    | 0.105 | 0.222  | ns  | -0.061 | 0.068 | 0.368  | ns  |
| Living status (Living trees):pH         | -0.227        | 0.359 | 0.526  | ns             | -0.881 | 0.352 | 0.012           | *   | -0.757  | 2.151               | 0.725  | ns  | 1.266    | 0.573 | 0.027  | *   | 0.054  | 0.403 | 0.893  | ns  |
| Fir:pH                                  | 0.301         | 0.363 | 0.407  | ns             | -0.187 | 0.322 | 0.561           | ns  | -1.167  | 1.231               | 0.343  | ns  | 0.559    | 0.468 | 0.232  | ns  | -1.461 | 0.393 | <0.001 | *** |
| Oak: pH                                 | -1.039        | 0.644 | 0.107  | ns             | -1.285 | 0.571 | 0.024           | *   | 10.847  | 16.4                | 0.511  | ns  | 0.59     | 0.674 | 0.381  | ns  | 2.538  | 0.748 | 0.001  | **  |
| Pine: pH                                | 1.094         | 0.348 | 0.002  | **             | -1.735 | 0.616 | 0.005           | **  | -10.626 | 108.9               | 0.922  | ns  | 1.569    | 0.649 | 0.016  | *   | -0.291 | 0.451 | 0.519  | ns  |
| Spruce: pH                              | 0.149         | 0.142 | 0.293  | ns             | 0.25   | 0.126 | 0.048           | *   | -0.821  | 0.657               | 0.211  | ns  | -0.044   | 0.196 | 0.822  | ns  | -0.434 | 0.152 | 0.004  | **  |
| Fir:Living status (Living trees)        | 0.07          | 0.186 | 0.706  | ns             | -0.597 | 0.207 | 0.004           | **  | 0.601   | 1.028               | 0.559  | ns  | -0.165   | 0.318 | 0.603  | ns  | 0.071  | 0.219 | 0.747  | ns  |
| Oak:Living status (Living trees)        | 0.375         | 0.177 | 0.034  | *              | -0.241 | 0.187 | 0.199           | ns  | -1.067  | 0.404               | 0.008  | **  | -0.345   | 0.279 | 0.216  | ns  | 0.053  | 0.261 | 0.838  | ns  |
| Pine:Living status (Living trees)       | 0.915         | 0.525 | 0.081  | (*)            | 0.229  | 0.41  | 0.577           | ns  | 0.058   | 0.9                 | 0.949  | ns  | 0.214    | 0.387 | 0.581  | ns  | 1.484  | 0.509 | 0.004  | **  |
| Spruce:Living status (Living trees)     | -0.018        | 0.147 | 0.902  | ns             | -0.376 | 0.297 | 0.206           | ns  | -1.108  | 2.206               | 0.616  | ns  | 0.295    | 0.518 | 0.569  | ns  | 0.111  | 0.215 | 0.604  | ns  |
| DBH:Fir:Living status (Living trees)    | 0.28          | 0.334 | 0.403  | ns             | 0.418  | 0.32  | 0.192           | ns  | -2.472  | 1.693               | 0.144  | ns  | -0.655   | 0.477 | 0.17   | ns  | 0.301  | 0.42  | 0.474  | ns  |
| DBH:Oak:Living status (Living trees)    | 0.155         | 0.308 | 0.614  | ns             | -0.021 | 0.272 | 0.938           | ns  | -0.78   | 1.423               | 0.584  | ns  | 0.226    | 0.405 | 0.578  | ns  | 0.578  | 0.331 | 0.08   | (*) |
| DBH:Pine:Living status (Living trees)   | 1.572         | 0.684 | 0.021  | *              | 1.091  | 0.625 | 0.081           | (*) | 9.922   | 13.357              | 0.458  | ns  | 0.398    | 0.666 | 0.55   | ns  | 1.482  | 0.747 | 0.047  | *   |
| DBH:Spruce:Living status (Living trees) | -0.295        | 0.333 | 0.375  | ns             | 0.833  | 0.438 | 0.057           | (*) | -3.628  | 128.023             | 0.977  | ns  | -0.085   | 0.463 | 0.854  | ns  | 0.49   | 0.394 | 0.214  | ns  |

624

625 Table S5 (continued)

|                                         | Woodpecker feeding holes |       |        | Rot      |        |       | Injuries |     |        | Conks of fungi |        |     | Bark characteristics |       |        |     |        |       |        |     |
|-----------------------------------------|--------------------------|-------|--------|----------|--------|-------|----------|-----|--------|----------------|--------|-----|----------------------|-------|--------|-----|--------|-------|--------|-----|
|                                         | Estimate                 | SE    | p      | Estimate | SE     | p     | Estimate | SE  | p      | Estimate       | SE     | p   | Estimate             | SE    | p      |     |        |       |        |     |
| Intercept                               | -0.92                    | 0.303 | 0.002  | **       | -3.213 | 0.348 | <0.001   | *** | -4.215 | 0.404          | <0.001 | *** | -0.534               | 0.231 | 0.021  | *   | -2.726 | 0.368 | <0.001 | *** |
| DBH                                     | 0.805                    | 0.19  | <0.001 | ***      | 0.928  | 0.207 | <0.001   | *** | -0.236 | 0.342          | 0.49   | ns  | 0.224                | 0.15  | 0.135  | ns  | 0.22   | 0.197 | 0.263  | ns  |
| Fir                                     | 0.352                    | 0.251 | 0.161  | ns       | -1.126 | 0.327 | 0.001    | **  | -0.961 | 0.445          | 0.031  | *   | -0.453               | 0.23  | 0.048  | *   | -0.238 | 0.342 | 0.487  | ns  |
| Oak                                     | 0.353                    | 0.274 | 0.196  | ns       | 1.385  | 0.321 | <0.001   | *** | -0.258 | 0.529          | 0.626  | ns  | -1.959               | 0.261 | <0.001 | *** | 1.69   | 0.295 | <0.001 | *** |
| Pine                                    | -0.98                    | 0.392 | 0.012  | *        | -1.083 | 0.64  | 0.091    | (*) | -1.298 | 0.54           | 0.016  | *   | -2.174               | 0.563 | <0.001 | *** | -0.094 | 0.525 | 0.857  | ns  |
| Spruce                                  | -0.573                   | 0.274 | 0.037  | *        | -0.389 | 0.333 | 0.242    | ns  | -1.099 | 0.595          | 0.065  | (*) | -1.195               | 0.283 | <0.001 | *** | 0.595  | 0.333 | 0.074  | (*) |
| Living status (Living trees)            | -4.721                   | 0.23  | <0.001 | ***      | -1.018 | 0.223 | <0.001   | *** | 1.701  | 0.304          | <0.001 | *** | -4.368               | 0.184 | <0.001 | *** | -3.257 | 0.222 | <0.001 | *** |
| pH                                      | -0.107                   | 0.277 | 0.699  | ns       | 0.523  | 0.285 | 0.067    | (*) | 0.649  | 0.249          | 0.009  | **  | -0.643               | 0.205 | 0.002  | **  | 0.673  | 0.31  | 0.03   | *   |
| Elevation                               | -0.447                   | 0.207 | 0.031  | *        | 0.249  | 0.218 | 0.255    | ns  | -0.175 | 0.145          | 0.229  | ns  | -0.512               | 0.179 | 0.004  | **  | -0.41  | 0.277 | 0.138  | ns  |
| DBH:Fir                                 | -0.281                   | 0.23  | 0.221  | ns       | -0.79  | 0.288 | 0.006    | **  | -0.395 | 0.531          | 0.457  | ns  | 0.203                | 0.191 | 0.287  | ns  | 0.224  | 0.278 | 0.421  | ns  |
| DBH:Oak                                 | 0.227                    | 0.275 | 0.409  | ns       | -0.348 | 0.27  | 0.198    | ns  | 0.402  | 0.489          | 0.412  | ns  | 0.14                 | 0.222 | 0.529  | ns  | -0.001 | 0.268 | 0.998  | ns  |
| DBH:Pine                                | -0.825                   | 0.368 | 0.025  | *        | -0.384 | 0.559 | 0.492    | ns  | 0.418  | 0.544          | 0.442  | ns  | -0.364               | 0.633 | 0.565  | ns  | -0.098 | 0.48  | 0.838  | ns  |
| DBH:Spruce                              | -0.383                   | 0.261 | 0.142  | ns       | -1.395 | 0.332 | <0.001   | *** | -0.69  | 0.734          | 0.347  | ns  | 0.424                | 0.25  | 0.09   | (*) | -0.493 | 0.299 | 0.099  | (*) |
| DBH:Living status (Living trees)        | <0.001                   | 0.21  | 0.999  | ns       | -0.609 | 0.212 | 0.004    | **  | 0.52   | 0.343          | 0.13   | ns  | 0.367                | 0.165 | 0.026  | *   | 0.228  | 0.209 | 0.276  | ns  |
| DBH:pH                                  | 0.162                    | 0.072 | 0.024  | *        | 0.075  | 0.065 | 0.251    | ns  | 0.076  | 0.034          | 0.028  | *   | -0.042               | 0.063 | 0.508  | ns  | 0.136  | 0.088 | 0.122  | ns  |
| Living status (Living trees):pH         | -0.665                   | 0.365 | 0.069  | (*)      | 0.559  | 0.339 | 0.099    | (*) | 0.722  | 0.446          | 0.106  | ns  | -0.564               | 0.357 | 0.114  | ns  | -0.271 | 0.405 | 0.504  | ns  |
| Fir:pH                                  | 0.445                    | 0.3   | 0.137  | ns       | -2.106 | 0.329 | <0.001   | *** | -0.196 | 0.529          | 0.711  | ns  | 1.636                | 0.28  | <0.001 | *** | -1.975 | 0.312 | <0.001 | *** |
| Oak: pH                                 | 0.786                    | 0.451 | 0.081  | (*)      | -1.32  | 0.7   | 0.059    | (*) | 0.248  | 0.523          | 0.636  | ns  | 0.809                | 0.89  | 0.363  | ns  | -0.951 | 0.755 | 0.208  | ns  |
| Pine: pH                                | -0.037                   | 0.366 | 0.92   | ns       | -1.219 | 0.404 | 0.003    | **  | 1.253  | 0.601          | 0.037  | *   | 0.269                | 0.45  | 0.55   | ns  | -1.72  | 0.489 | <0.001 | *** |
| Spruce: pH                              | 0.356                    | 0.141 | 0.011  | *        | -0.386 | 0.15  | 0.01     | *   | -0.412 | 0.146          | 0.005  | **  | 0.223                | 0.121 | 0.066  | (*) | -0.983 | 0.154 | <0.001 | *** |
| Fir:Living status (Living trees)        | -0.016                   | 0.227 | 0.944  | ns       | -0.356 | 0.18  | 0.048    | *   | -0.565 | 0.093          | <0.001 | *** | 0.513                | 0.188 | 0.006  | **  | 0.814  | 0.321 | 0.011  | *   |
| Oak:Living status (Living trees)        | 0.174                    | 0.219 | 0.428  | ns       | -0.305 | 0.231 | 0.187    | ns  | -0.276 | 0.116          | 0.018  | *   | 0.275                | 0.207 | 0.184  | ns  | -0.259 | 0.221 | 0.242  | ns  |
| Pine:Living status (Living trees)       | -0.204                   | 0.29  | 0.482  | ns       | -0.466 | 0.43  | 0.278    | ns  | -0.645 | 0.157          | <0.001 | *** | 0.444                | 0.361 | 0.219  | ns  | 0.288  | 0.386 | 0.455  | ns  |
| Spruce:Living status (Living trees)     | 0.005                    | 0.277 | 0.986  | ns       | -0.833 | 0.227 | <0.001   | *** | -1.081 | 0.119          | <0.001 | *** | 0.164                | 0.229 | 0.474  | ns  | 0.193  | 0.307 | 0.53   | ns  |
| DBH:Fir:Living status (Living trees)    | -0.232                   | 0.313 | 0.459  | ns       | 0.737  | 0.3   | 0.014    | *   | 0.03   | 0.535          | 0.956  | ns  | -0.226               | 0.273 | 0.407  | ns  | -0.458 | 0.338 | 0.175  | ns  |
| DBH:Oak:Living status (Living trees)    | -0.529                   | 0.29  | 0.068  | (*)      | 0.312  | 0.282 | 0.269    | ns  | -0.409 | 0.492          | 0.406  | ns  | -0.44                | 0.24  | 0.066  | (*) | -0.204 | 0.287 | 0.477  | ns  |
| DBH:Pine:Living status (Living trees)   | 0.562                    | 0.478 | 0.24   | ns       | 0.967  | 0.727 | 0.184    | ns  | -0.671 | 0.554          | 0.226  | ns  | 0.464                | 1.214 | 0.702  | ns  | 0.048  | 1.001 | 0.962  | ns  |
| DBH:Spruce:Living status (Living trees) | 0.058                    | 0.334 | 0.861  | ns       | 1.1    | 0.379 | 0.004    | **  | 0.213  | 0.739          | 0.773  | ns  | -1.409               | 0.45  | 0.002  | **  | -0.036 | 0.448 | 0.936  | ns  |

626

627 Table S5 (continued)

|                                         | Moss (>50%) |       |        |     | Lichen (>50%) |       |        |     | Ivy (>50%) |       |        | Small branches |        |       | Medium branches |     |        |       |        |     |
|-----------------------------------------|-------------|-------|--------|-----|---------------|-------|--------|-----|------------|-------|--------|----------------|--------|-------|-----------------|-----|--------|-------|--------|-----|
|                                         | Estimate    | SE    | p      |     | Estimate      | SE    | p      |     | Estimate   | SE    | p      | Estimate       | SE     | p     | Estimate        | SE  | p      |       |        |     |
| Intercept                               | -0.168      | 0.618 | 0.785  | ns  | -3.5          | 0.776 | <0.001 | *** | -6.781     | 0.655 | <0.001 | ***            | -4.219 | 0.429 | <0.001          | *** | -4.441 | 0.353 | <0.001 | *** |
| DBH                                     | 0.174       | 0.189 | 0.358  | ns  | -0.333        | 0.27  | 0.218  | ns  | 0.29       | 0.407 | 0.476  | ns             | -0.212 | 0.35  | 0.544           | ns  | 0.359  | 0.351 | 0.306  | ns  |
| Fir                                     | -1.535      | 0.256 | <0.001 | *** | 0.189         | 0.318 | 0.552  | ns  | -0.889     | 0.621 | 0.152  | ns             | 0.774  | 0.356 | 0.03            | *   | 1.531  | 0.341 | <0.001 | *** |
| Oak                                     | -1.071      | 0.287 | <0.001 | *** | 0.975         | 0.427 | 0.022  | *   | 1.084      | 0.512 | 0.034  | *              | 0.333  | 0.432 | 0.441           | ns  | 1.344  | 0.363 | <0.001 | *** |
| Pine                                    | -1.973      | 0.529 | <0.001 | *** | 0.334         | 0.479 | 0.485  | ns  | 0.63       | 0.972 | 0.517  | ns             | 0.776  | 0.505 | 0.124           | ns  | 1.17   | 0.518 | 0.024  | *   |
| Spruce                                  | -2.116      | 0.305 | <0.001 | *** | -0.98         | 0.339 | 0.004  | **  | 0.36       | 0.568 | 0.526  | ns             | 0.341  | 0.46  | 0.459           | ns  | -1.892 | 1.329 | 0.155  | ns  |
| Living status (Living trees)            | 0.832       | 0.173 | <0.001 | *** | 1.519         | 0.237 | <0.001 | *** | 0.524      | 0.487 | 0.283  | ns             | 2.509  | 0.291 | <0.001          | *** | 1.382  | 0.279 | <0.001 | *** |
| pH                                      | 0.09        | 0.391 | 0.819  | ns  | -0.496        | 0.453 | 0.274  | ns  | 1.524      | 0.492 | 0.002  | **             | 0.417  | 0.253 | 0.099           | (*) | 0.481  | 0.224 | 0.032  | *   |
| Elevation                               | -0.785      | 0.29  | 0.007  | **  | 2.353         | 0.388 | <0.001 | *** | -2.124     | 0.351 | <0.001 | ***            | -0.241 | 0.158 | 0.127           | ns  | -0.237 | 0.159 | 0.136  | ns  |
| DBH:Fir                                 | 0.276       | 0.273 | 0.312  | ns  | 0.421         | 0.343 | 0.219  | ns  | -0.046     | 0.482 | 0.925  | ns             | 0.615  | 0.393 | 0.118           | ns  | -0.276 | 0.406 | 0.496  | ns  |
| DBH:Oak                                 | -0.165      | 0.276 | 0.55   | ns  | 0.494         | 0.463 | 0.286  | ns  | -0.237     | 0.449 | 0.598  | ns             | -0.822 | 0.507 | 0.105           | ns  | -0.308 | 0.419 | 0.462  | ns  |
| DBH:Pine                                | 1.284       | 0.672 | 0.056  | (*) | 0.242         | 0.523 | 0.643  | ns  | 0.593      | 1.215 | 0.625  | ns             | -0.892 | 0.542 | 0.1             | ns  | -0.459 | 0.581 | 0.43   | ns  |
| DBH:Spruce                              | 0.586       | 0.302 | 0.053  | (*) | 0.505         | 0.371 | 0.173  | ns  | -0.437     | 0.534 | 0.413  | ns             | 0.393  | 0.458 | 0.391           | ns  | 0.444  | 0.799 | 0.578  | ns  |
| DBH:Living status (Living trees)        | 0.362       | 0.193 | 0.061  | (*) | 0.578         | 0.273 | 0.034  | *   | -0.041     | 0.41  | 0.921  | ns             | 0.537  | 0.351 | 0.127           | ns  | 0.558  | 0.354 | 0.115  | ns  |
| DBH:pH                                  | 0.074       | 0.042 | 0.077  | (*) | 0.046         | 0.048 | 0.34   | ns  | -0.001     | 0.091 | 0.991  | ns             | -0.162 | 0.032 | <0.001          | *** | -0.022 | 0.043 | 0.608  | ns  |
| Living status (Living trees):pH         | 0.21        | 0.254 | 0.407  | ns  | 0.499         | 0.317 | 0.115  | ns  | 0.692      | 0.555 | 0.212  | ns             | -1.262 | 0.354 | <0.001          | *** | -3.727 | 0.385 | <0.001 | *** |
| Fir:pH                                  | 1.853       | 0.287 | <0.001 | *** | -0.852        | 0.422 | 0.043  | *   | -0.433     | 0.501 | 0.388  | ns             | 0.614  | 0.432 | 0.155           | ns  | 0.131  | 0.361 | 0.718  | ns  |
| Oak: pH                                 | -2.15       | 0.549 | <0.001 | *** | -0.799        | 0.485 | 0.1    | ns  | -1.047     | 1.018 | 0.304  | ns             | 0.407  | 0.496 | 0.412           | ns  | -0.239 | 0.508 | 0.639  | ns  |
| Pine: pH                                | -0.963      | 0.305 | 0.002  | **  | 0.537         | 0.331 | 0.104  | ns  | 0.117      | 0.539 | 0.828  | ns             | -1.459 | 0.472 | 0.002           | **  | -0.546 | 1.373 | 0.691  | ns  |
| Spruce: pH                              | -0.029      | 0.11  | 0.791  | ns  | -0.383        | 0.126 | 0.002  | **  | -0.523     | 0.342 | 0.127  | ns             | 0.005  | 0.108 | 0.967           | ns  | -0.209 | 0.125 | 0.094  | (*) |
| Fir:Living status (Living trees)        | 0.377       | 0.125 | 0.003  | **  | -0.718        | 0.161 | <0.001 | *** | 0.802      | 0.506 | 0.113  | ns             | -0.752 | 0.103 | <0.001          | *** | -0.765 | 0.163 | <0.001 | *** |
| Oak:Living status (Living trees)        | 0.172       | 0.141 | 0.224  | ns  | -0.428        | 0.168 | 0.011  | *   | 0.488      | 0.196 | 0.013  | *              | -0.074 | 0.088 | 0.402           | ns  | -0.256 | 0.095 | 0.007  | **  |
| Pine:Living status (Living trees)       | 0.555       | 0.217 | 0.01   | *   | -0.043        | 0.188 | 0.819  | ns  | -0.065     | 0.397 | 0.87   | ns             | -0.302 | 0.139 | 0.03            | *   | 0.011  | 0.176 | 0.95   | ns  |
| Spruce:Living status (Living trees)     | 0.594       | 0.158 | <0.001 | *** | 0.105         | 0.166 | 0.525  | ns  | 0.568      | 0.539 | 0.292  | ns             | 0.147  | 0.132 | 0.268           | ns  | -0.511 | 0.258 | 0.047  | *   |
| DBH:Fir:Living status (Living trees)    | -0.426      | 0.284 | 0.134  | ns  | -0.483        | 0.351 | 0.169  | ns  | 0.272      | 0.496 | 0.584  | ns             | -0.201 | 0.398 | 0.614           | ns  | 0.456  | 0.423 | 0.282  | ns  |
| DBH:Oak:Living status (Living trees)    | -0.42       | 0.28  | 0.134  | ns  | -0.531        | 0.467 | 0.255  | ns  | 0.262      | 0.454 | 0.564  | ns             | 0.859  | 0.508 | 0.091           | (*) | 0.327  | 0.422 | 0.439  | ns  |
| DBH:Pine:Living status (Living trees)   | -2.209      | 0.739 | 0.003  | **  | -0.173        | 0.568 | 0.761  | ns  | -1.185     | 1.304 | 0.363  | ns             | 1.251  | 0.552 | 0.023           | *   | 0.964  | 0.597 | 0.106  | ns  |
| DBH:Spruce:Living status (Living trees) | -0.704      | 0.321 | 0.028  | *   | -0.895        | 0.386 | 0.02   | *   | 0.696      | 0.549 | 0.205  | ns             | 0.348  | 0.471 | 0.461           | ns  | -0.337 | 0.828 | 0.684  | ns  |

628



629 Table S5 (continued)

|                                         | Large branches |          |        |     | Crown skeleton |       |        |     | Forks    |       |        |     | Broken stems |       |        |     |
|-----------------------------------------|----------------|----------|--------|-----|----------------|-------|--------|-----|----------|-------|--------|-----|--------------|-------|--------|-----|
|                                         | Estimate       | SE       | p      |     | Estimate       | SE    | p      |     | Estimate | SE    | p      |     | Estimate     | SE    | p      |     |
| Intercept                               | -5.839         | 0.644    | <0.001 | *** | -5.822         | 0.933 | <0.001 | *** | -6.104   | 0.804 | <0.001 | *** | -3.511       | 0.361 | <0.001 | *** |
| DBH                                     | 0.729          | 0.499    | 0.144  | ns  | 0.12           | 0.304 | 0.694  | ns  | -1.374   | 0.763 | 0.072  | (*) | 0.779        | 0.238 | 0.001  | **  |
| Fir                                     | -1.928         | 1.504    | 0.2    | ns  | -1.784         | 1.031 | 0.084  | .   | 0.395    | 0.775 | 0.61   | ns  | 0.121        | 0.31  | 0.696  | ns  |
| Oak                                     | -0.396         | 0.857    | 0.644  | ns  | 0.091          | 0.424 | 0.83   | ns  | 2.225    | 0.847 | 0.009  | **  | -0.347       | 0.44  | 0.43   | ns  |
| Pine                                    | 1.042          | 0.924    | 0.26   | ns  | 0.732          | 0.637 | 0.25   | ns  | 0.301    | 1.077 | 0.78   | ns  | -0.867       | 0.532 | 0.103  | ns  |
| Spruce                                  | -18.493        | 3608.741 | 0.996  | ns  | 1.755          | 0.502 | <0.001 | *** | 0.474    | 0.81  | 0.559  | ns  | -0.331       | 0.355 | 0.351  | ns  |
| Living status (Living trees)            | -0.703         | 0.593    | 0.236  | ns  | -4.754         | 0.512 | <0.001 | *** | 3.597    | 0.731 | <0.001 | *** | -0.25        | 0.266 | 0.347  | ns  |
| pH                                      | 0.032          | 0.403    | 0.937  | ns  | -0.394         | 0.634 | 0.534  | ns  | -0.209   | 0.299 | 0.485  | ns  | 0.688        | 0.251 | 0.006  | **  |
| Elevation                               | -0.214         | 0.277    | 0.438  | ns  | -0.784         | 0.304 | 0.01   | *   | 1.543    | 0.198 | <0.001 | *** | 0.278        | 0.165 | 0.092  | (*) |
| DBH:Fir                                 | 0.314          | 0.947    | 0.74   | ns  | -0.539         | 0.839 | 0.52   | ns  | 2.116    | 0.8   | 0.008  | **  | -0.551       | 0.286 | 0.054  | (*) |
| DBH:Oak                                 | -0.683         | 0.742    | 0.357  | ns  | -0.05          | 0.349 | 0.887  | ns  | 1.43     | 0.865 | 0.098  | (*) | -0.135       | 0.331 | 0.682  | ns  |
| DBH:Pine                                | 0.768          | 0.872    | 0.378  | ns  | 0.666          | 0.506 | 0.188  | ns  | 1.042    | 1.111 | 0.348  | ns  | -1.74        | 0.512 | 0.001  | **  |
| DBH:Spruce                              | -1.007         | 4451.258 | 1      | ns  | -0.904         | 0.495 | 0.068  | (*) | 2        | 0.804 | 0.013  | *   | -0.405       | 0.313 | 0.195  | ns  |
| DBH:Living status (Living trees)        | 0.505          | 0.51     | 0.322  | ns  | -0.049         | 0.425 | 0.908  | ns  | 2.028    | 0.764 | 0.008  | **  | -0.53        | 0.242 | 0.028  | *   |
| DBH:pH                                  | -0.086         | 0.112    | 0.443  | ns  | 0.372          | 0.153 | 0.015  | *   | 0.138    | 0.038 | <0.001 | *** | 0.09         | 0.047 | 0.056  | (*) |
| Living status (Living trees):pH         | -0.211         | 1.74     | 0.903  | ns  | 2.824          | 0.933 | 0.002  | **  | -1.749   | 0.777 | 0.024  | *   | 0.242        | 0.314 | 0.442  | ns  |
| Fir:pH                                  | 1.881          | 0.863    | 0.029  | *   | 0.409          | 0.576 | 0.478  | ns  | -2.486   | 0.845 | 0.003  | **  | 0.282        | 0.44  | 0.521  | ns  |
| Oak: pH                                 | -0.516         | 0.938    | 0.582  | ns  | 2.212          | 0.729 | 0.002  | **  | -1.196   | 1.077 | 0.267  | ns  | 1.084        | 0.523 | 0.038  | *   |
| Pine: pH                                | 11.885         | 3608.739 | 0.997  | ns  | 1.664          | 0.669 | 0.013  | *   | -1.927   | 0.813 | 0.018  | *   | 0.451        | 0.364 | 0.216  | ns  |
| Spruce: pH                              | -0.01          | 0.312    | 0.975  | ns  | 0.372          | 0.266 | 0.161  | ns  | -0.201   | 0.166 | 0.226  | ns  | -0.361       | 0.111 | 0.001  | **  |
| Fir:Living status (Living trees)        | 0.169          | 0.728    | 0.816  | ns  | 1.987          | 1.066 | 0.062  | (*) | 0.682    | 0.102 | <0.001 | *** | -0.354       | 0.121 | 0.003  | **  |
| Oak:Living status (Living trees)        | -0.234         | 0.278    | 0.4    | ns  | 0.181          | 0.576 | 0.753  | ns  | 0.05     | 0.136 | 0.712  | ns  | 0.186        | 0.203 | 0.359  | ns  |
| Pine:Living status (Living trees)       | -0.338         | 0.442    | 0.445  | ns  | 1.75           | 0.679 | 0.01   | *   | 0.319    | 0.178 | 0.073  | (*) | -0.126       | 0.188 | 0.504  | ns  |
| Spruce:Living status (Living trees)     | 2.271          | 6.236    | 0.716  | ns  | 0.845          | 0.475 | 0.075  | (*) | -0.295   | 0.138 | 0.032  | *   | -0.325       | 0.17  | 0.056  | (*) |
| DBH:Fir:Living status (Living trees)    | -0.726         | 1.054    | 0.491  | ns  | 1.364          | 0.902 | 0.131  | ns  | -2.664   | 0.803 | 0.001  | **  | -0.43        | 0.297 | 0.147  | ns  |
| DBH:Oak:Living status (Living trees)    | 0.353          | 0.75     | 0.638  | ns  | 0.645          | 0.471 | 0.171  | ns  | -1.516   | 0.866 | 0.08   | (*) | -0.246       | 0.342 | 0.471  | ns  |
| DBH:Pine:Living status (Living trees)   | -0.34          | 0.955    | 0.722  | ns  | 0.31           | 0.567 | 0.584  | ns  | -1.093   | 1.121 | 0.329  | ns  | 0.753        | 0.532 | 0.157  | ns  |
| DBH:Spruce:Living status (Living trees) | 2.124          | 4451.258 | 1      | ns  | 1.561          | 0.615 | 0.011  | *   | -2.744   | 0.808 | 0.001  | **  | -0.293       | 0.327 | 0.371  | ns  |

630

631 Figure S1: Relationship between total number of microhabitats (N microhabitats per tree) and Diameter at  
632 Breast Height (DBH, cm) by genus for living trees only. Lines represent estimates from generalized mixed  
633 effect models with a Poisson error distribution. Ribbons show the 95% confidence interval of the mean. For  
634 this representation, pH and elevation were held constant. Ash: *Fraxinus excelsior*; beech: *Fagus sylvatica*;  
635 chestnut: *Castanea sativa*; fir: *Abies alba*; hornbeam: *Carpinus betulus*; larch: *Larix decidua*; maple: *Acer*  
636 spp., oak: *Quercus* spp.; pine: *Pinus* spp.; poplar: *Populus* spp.; and spruce: *Picea abies*.

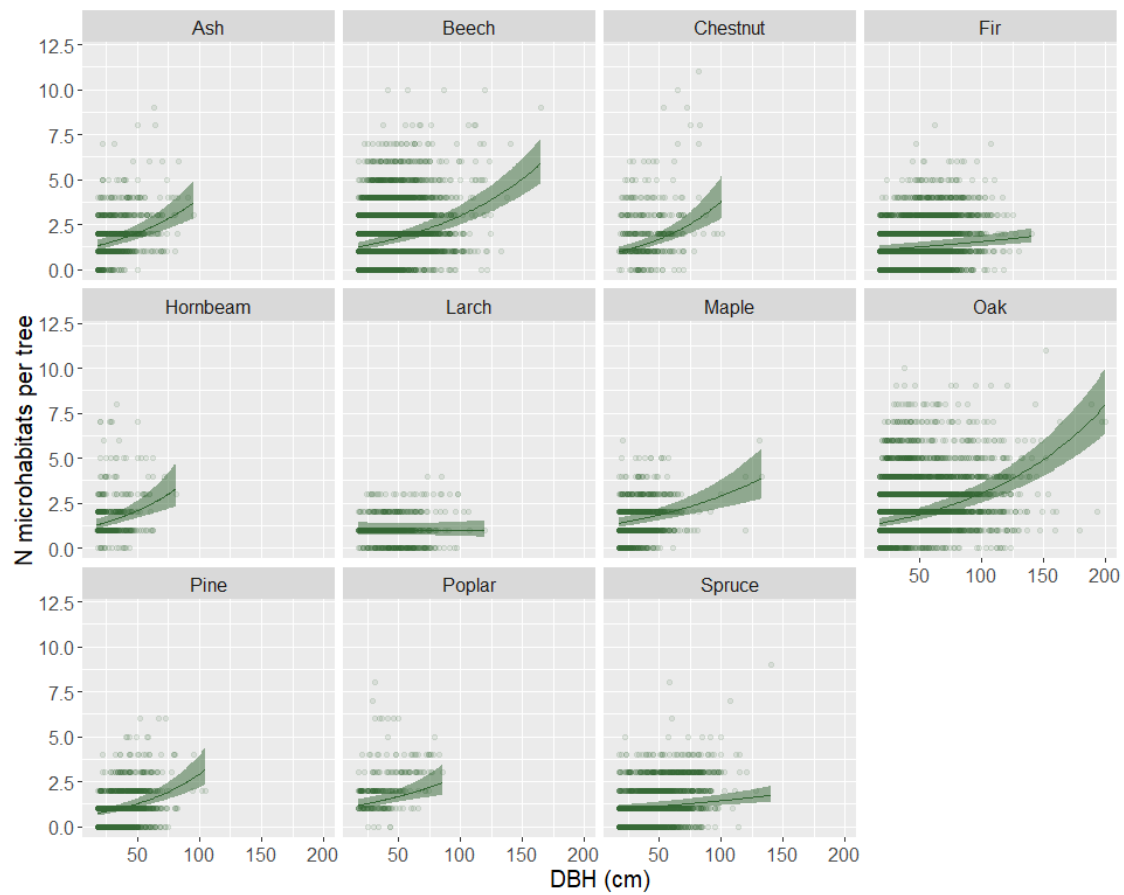

637

638 Figure S2: Relationship between occurrence of microhabitats per tree and Diameter at Breast Height (DBH,  
639 cm) by species and living status (living vs. dead standing trees). Lines represent estimates from generalized  
640 mixed effect models with a binomial error distribution. Ribbons show the 95% confidence interval of the mean.  
641 For the representation, pH and elevation were held constant. Beech: *Fagus sylvatica*; fir: *Abies alba*; oak:  
642 *Quercus* spp.; pine: *Pinus* spp.; and spruce: *Picea abies*.

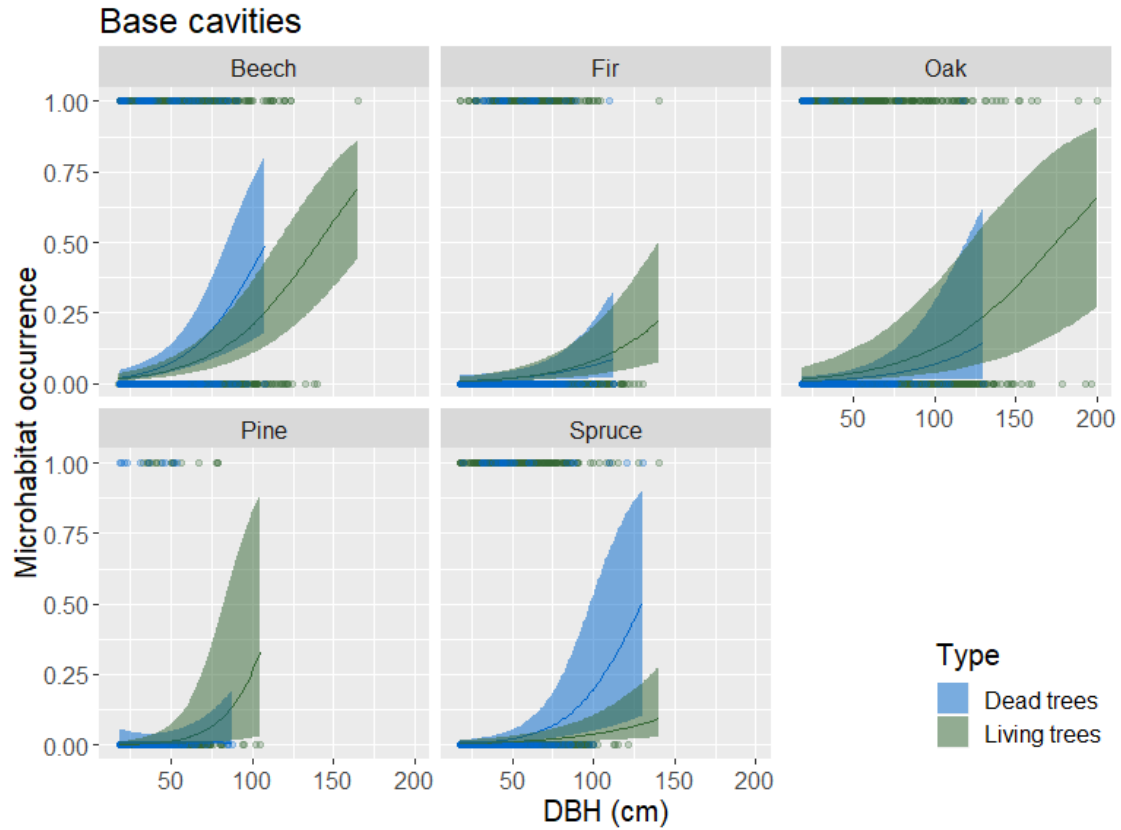

643

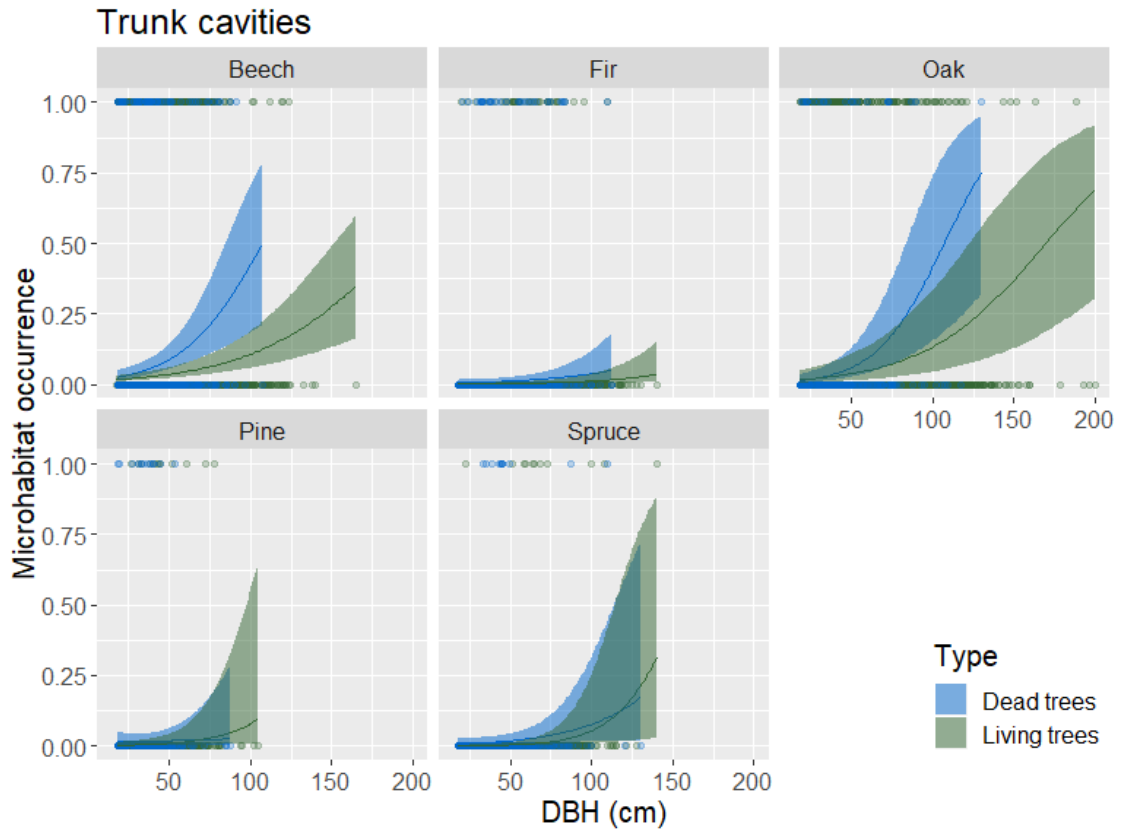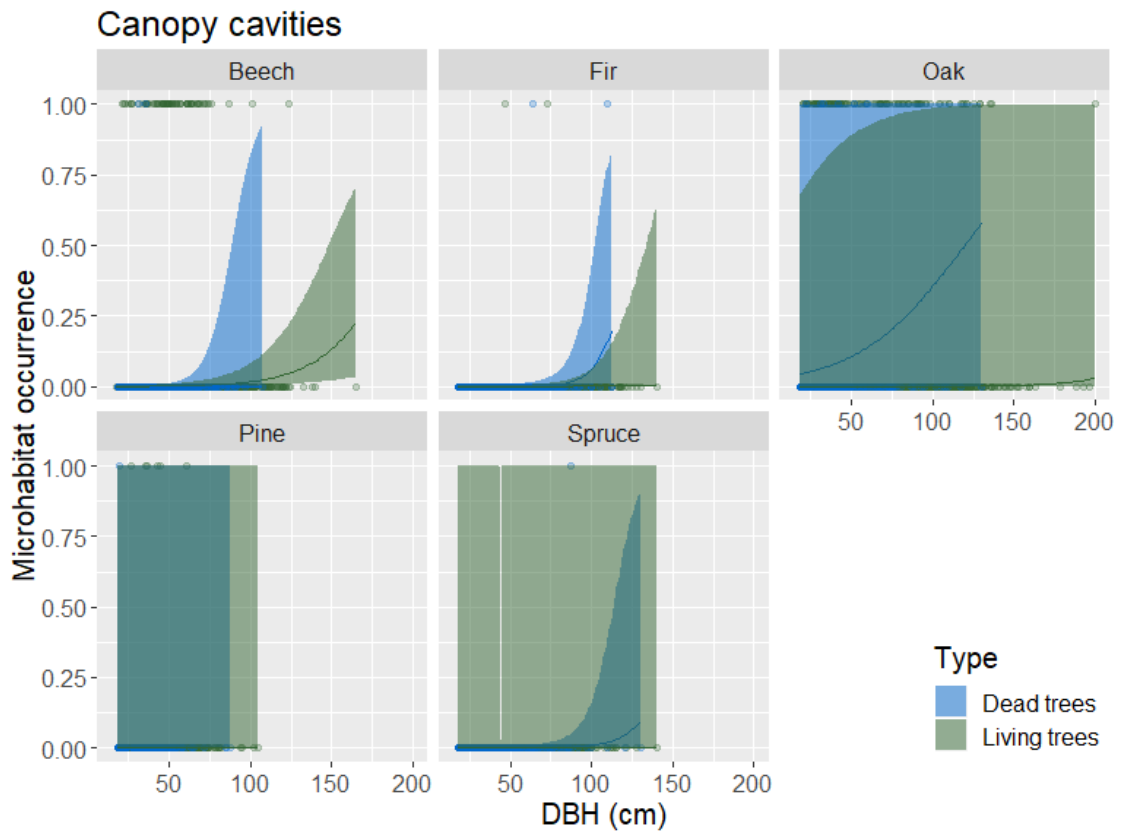

### Woodpecker cavities

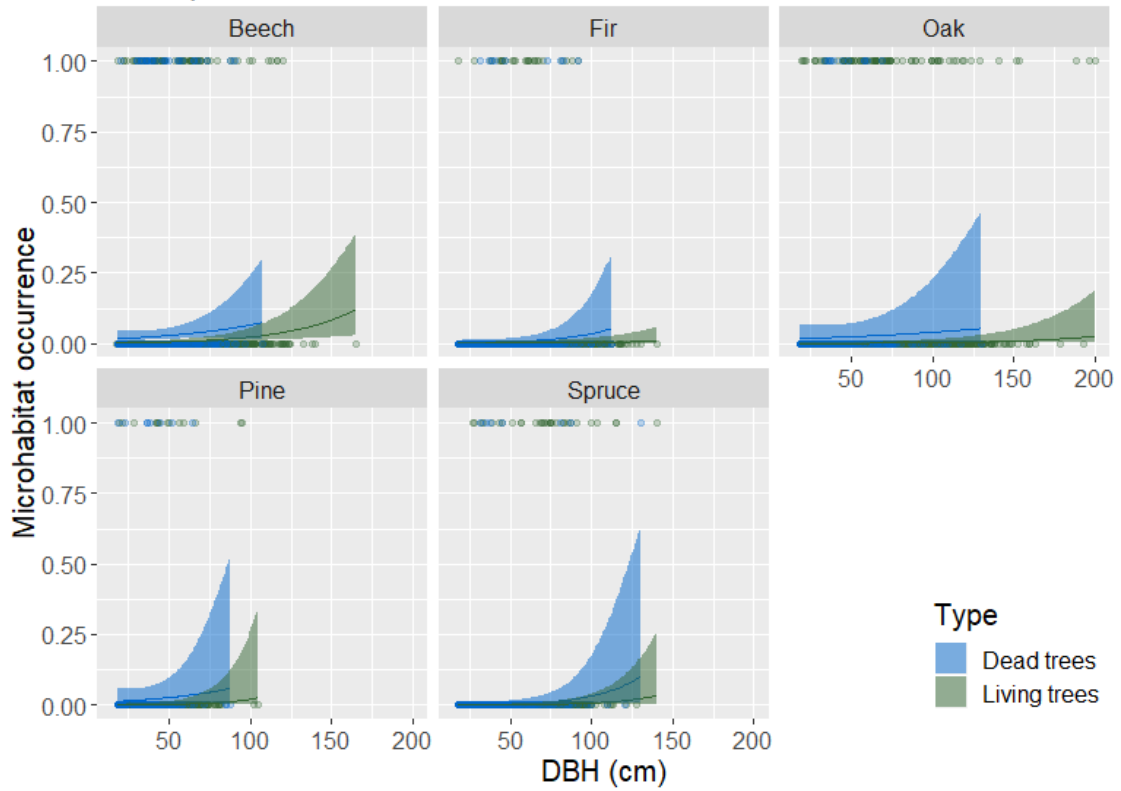

646

### Cracks

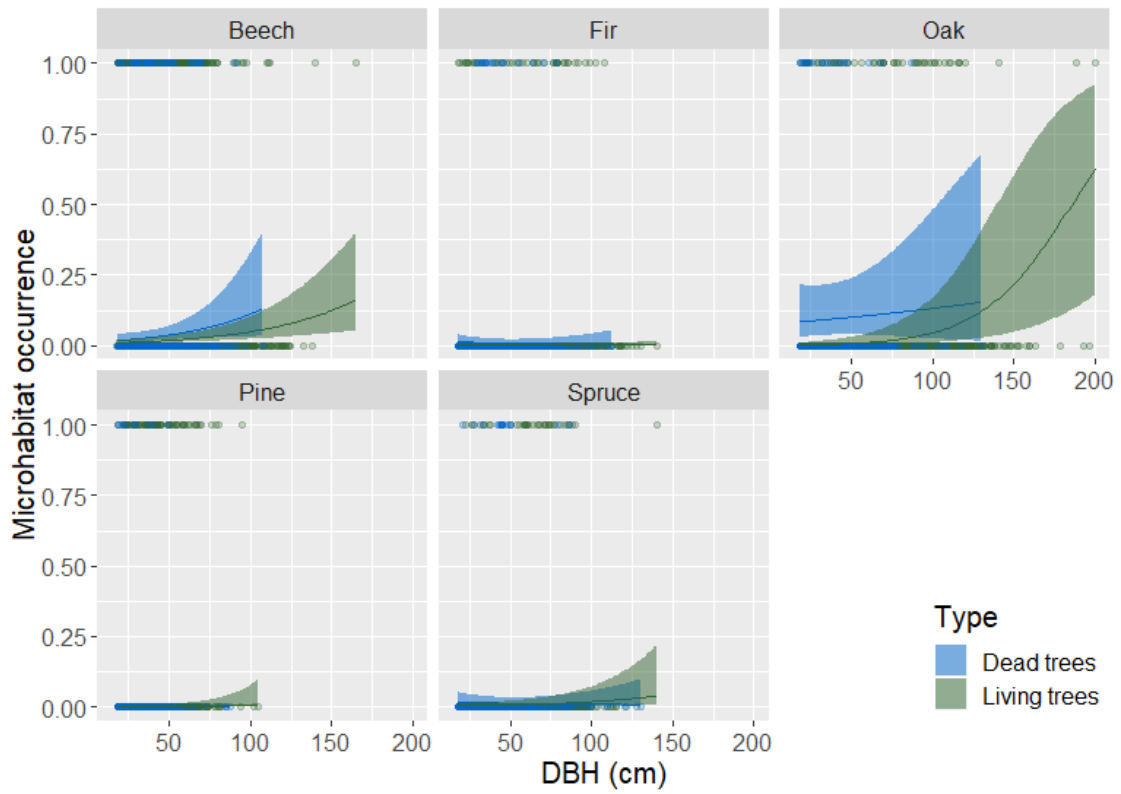

647

### Woodpecker feeding holes

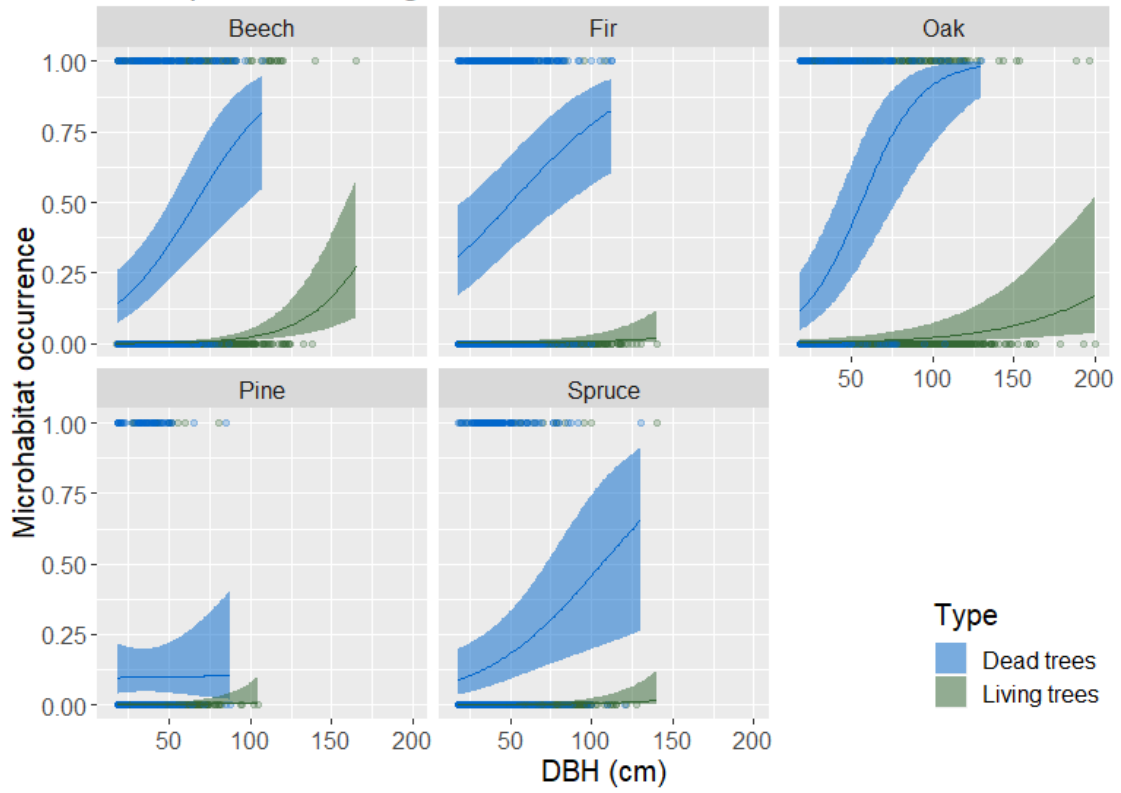

648

### Rot

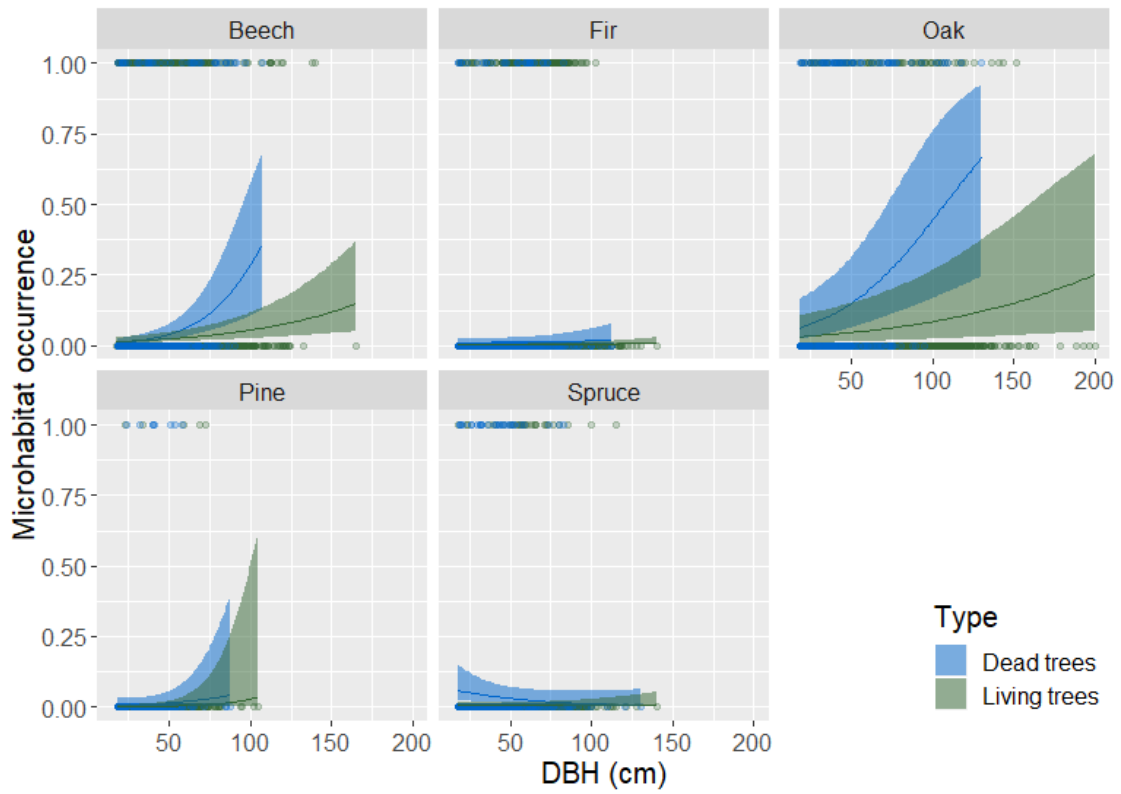

649

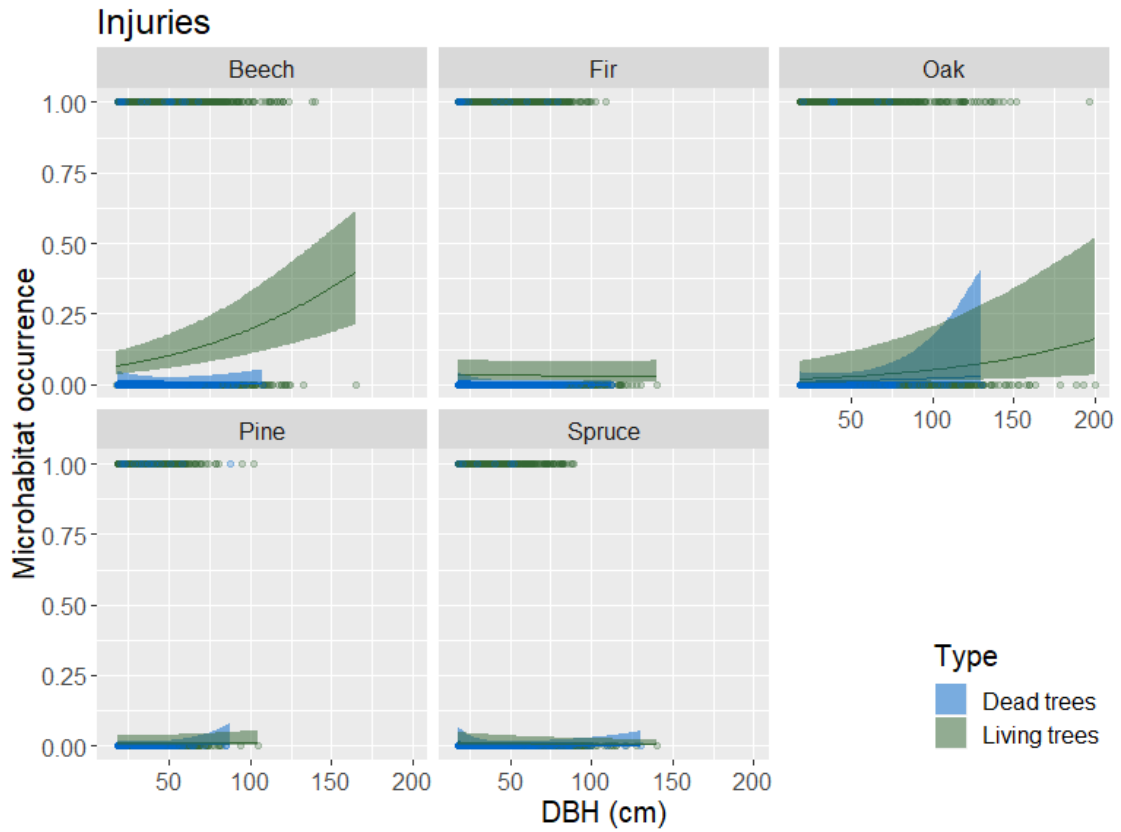

650

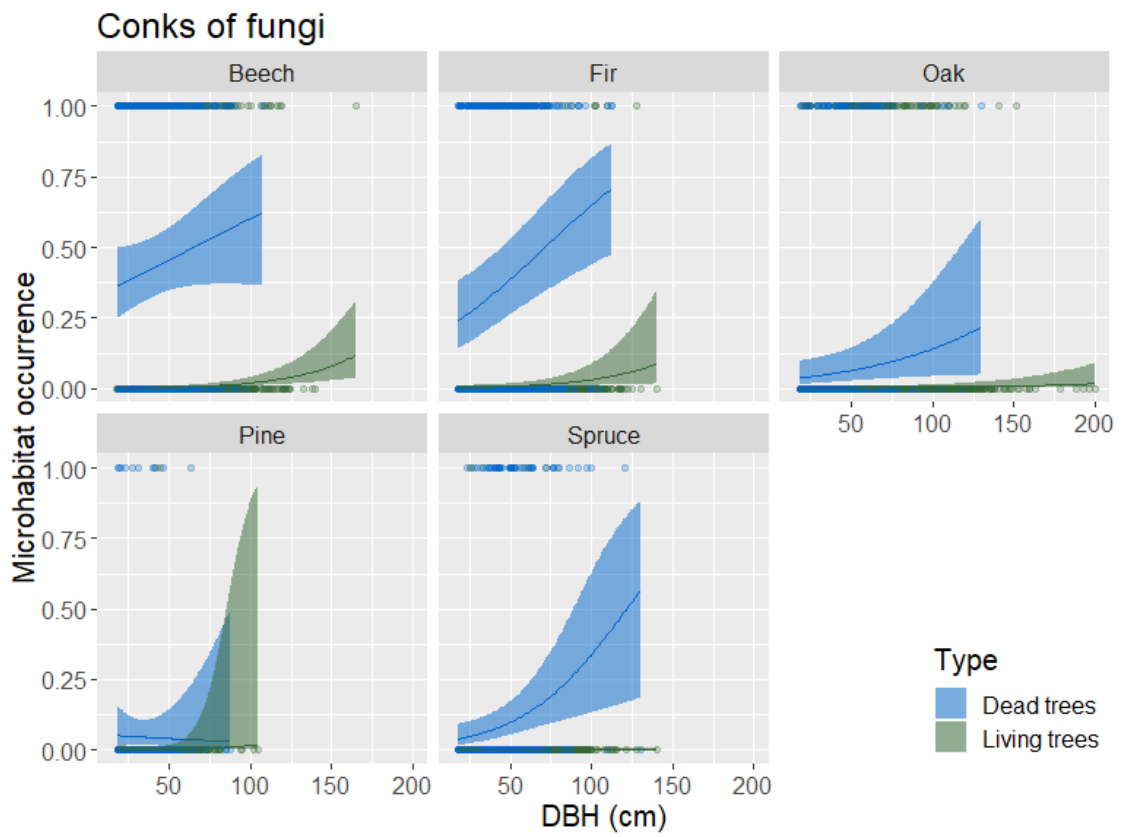

651

### Bark characteristics

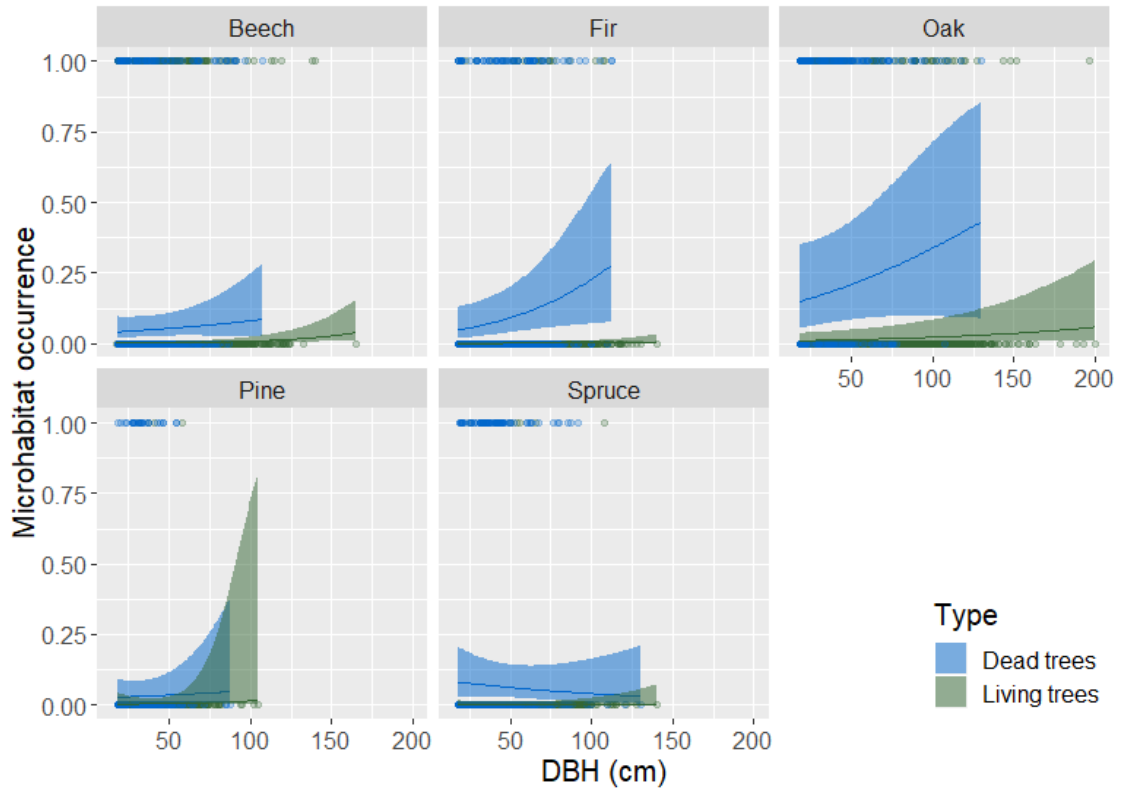

652

### Moss cover >50%

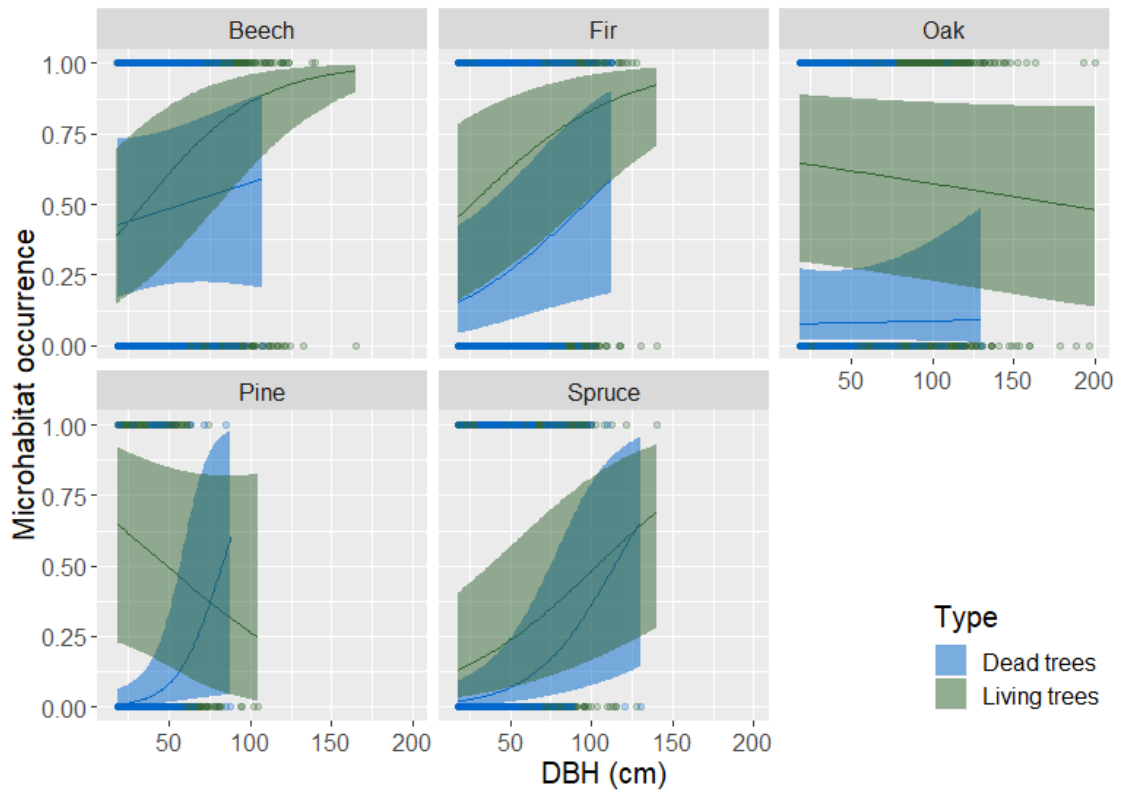

653



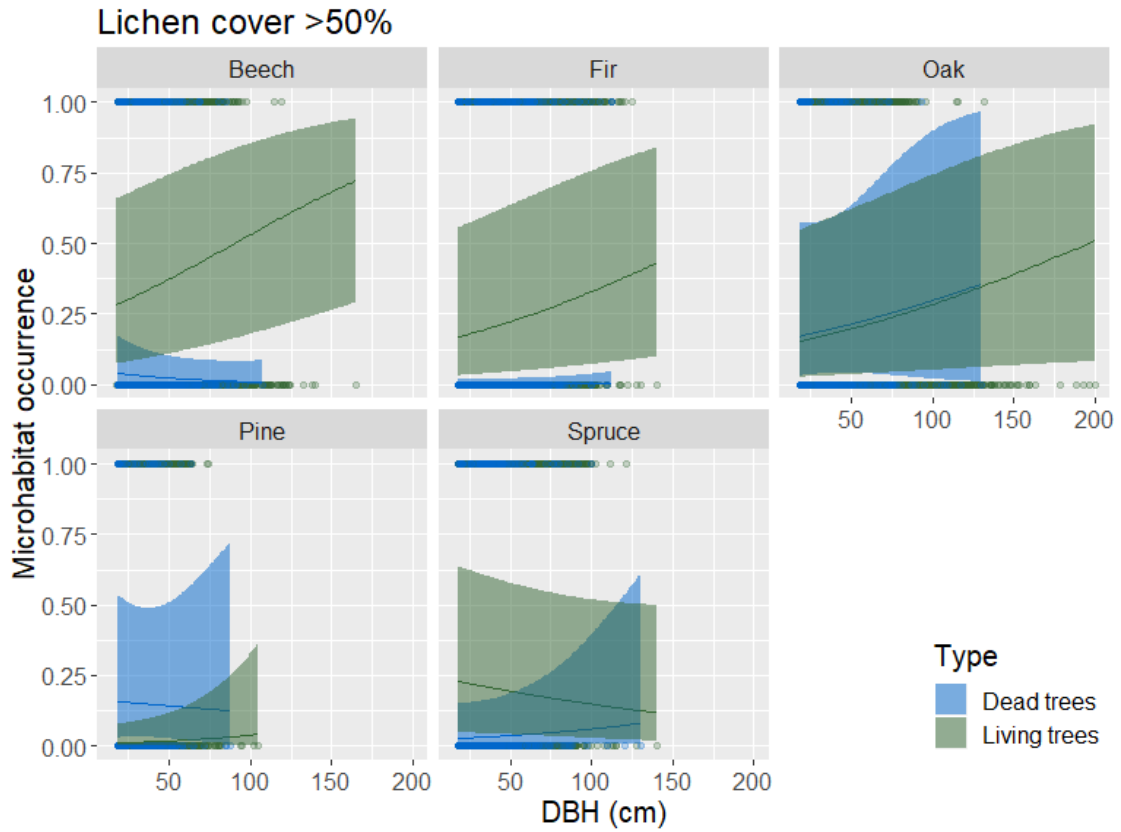

654

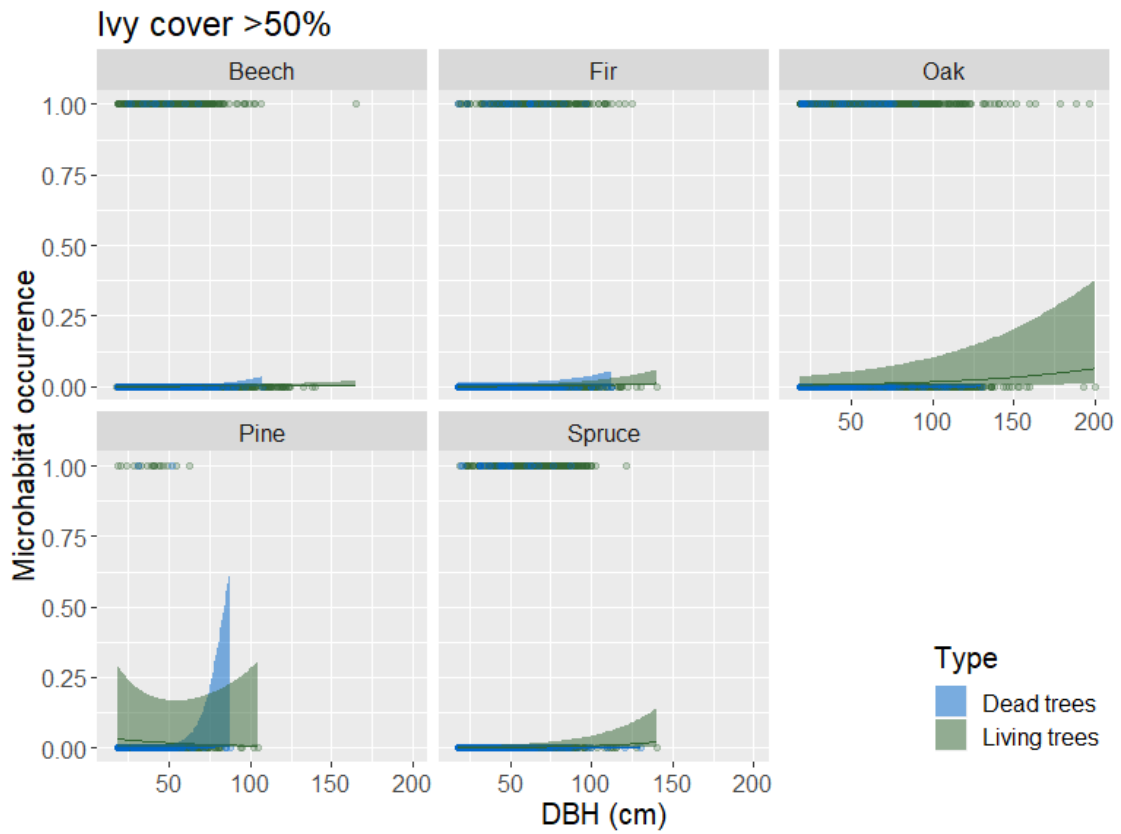

655

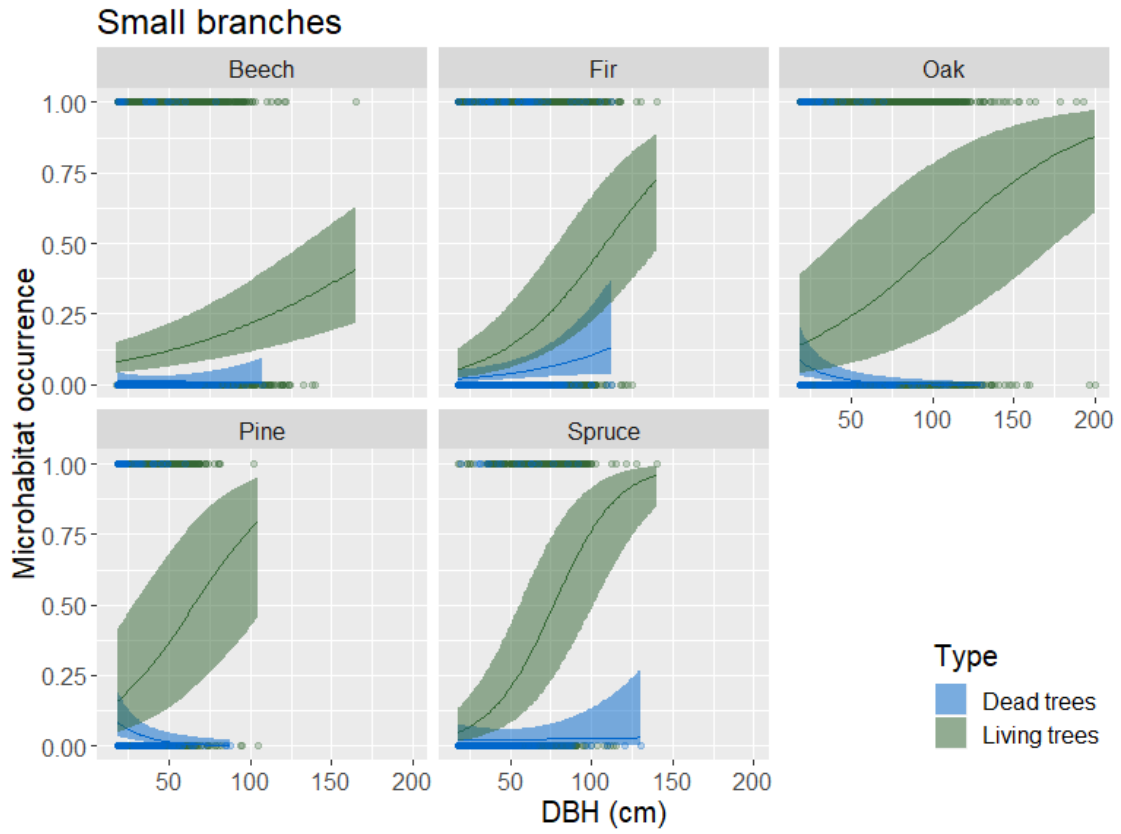

656

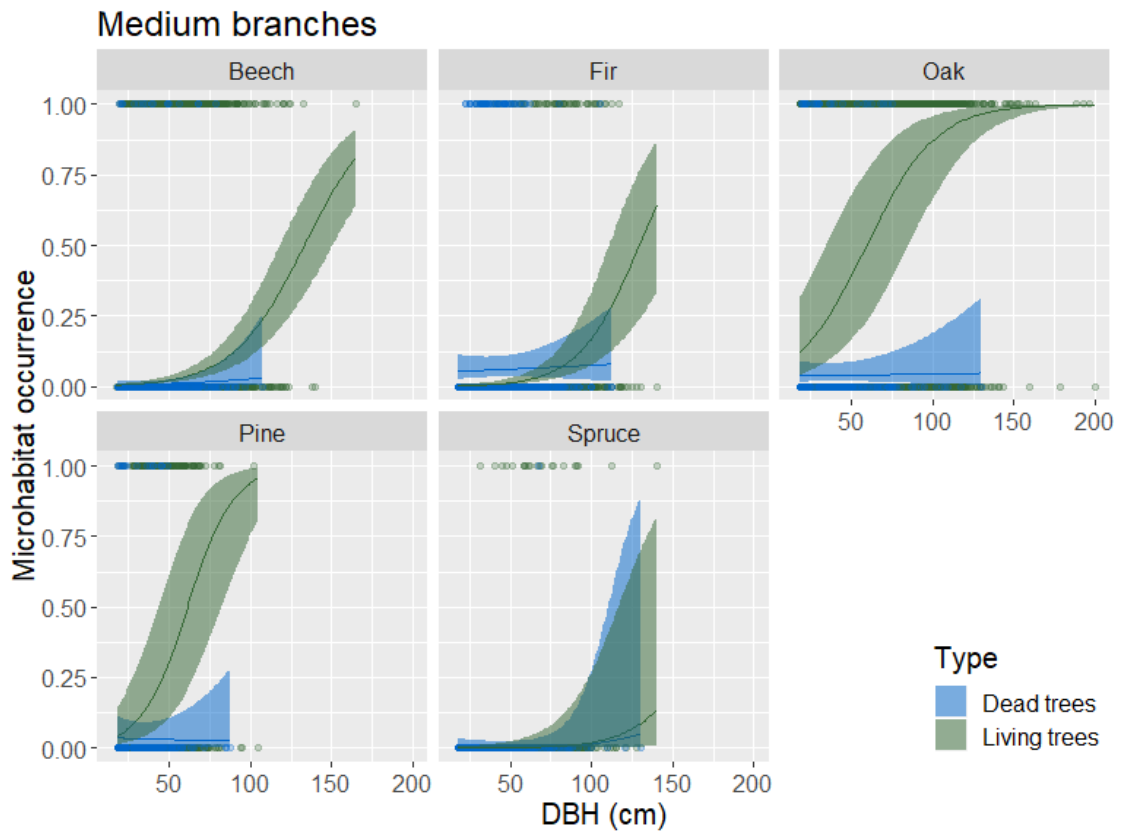

657

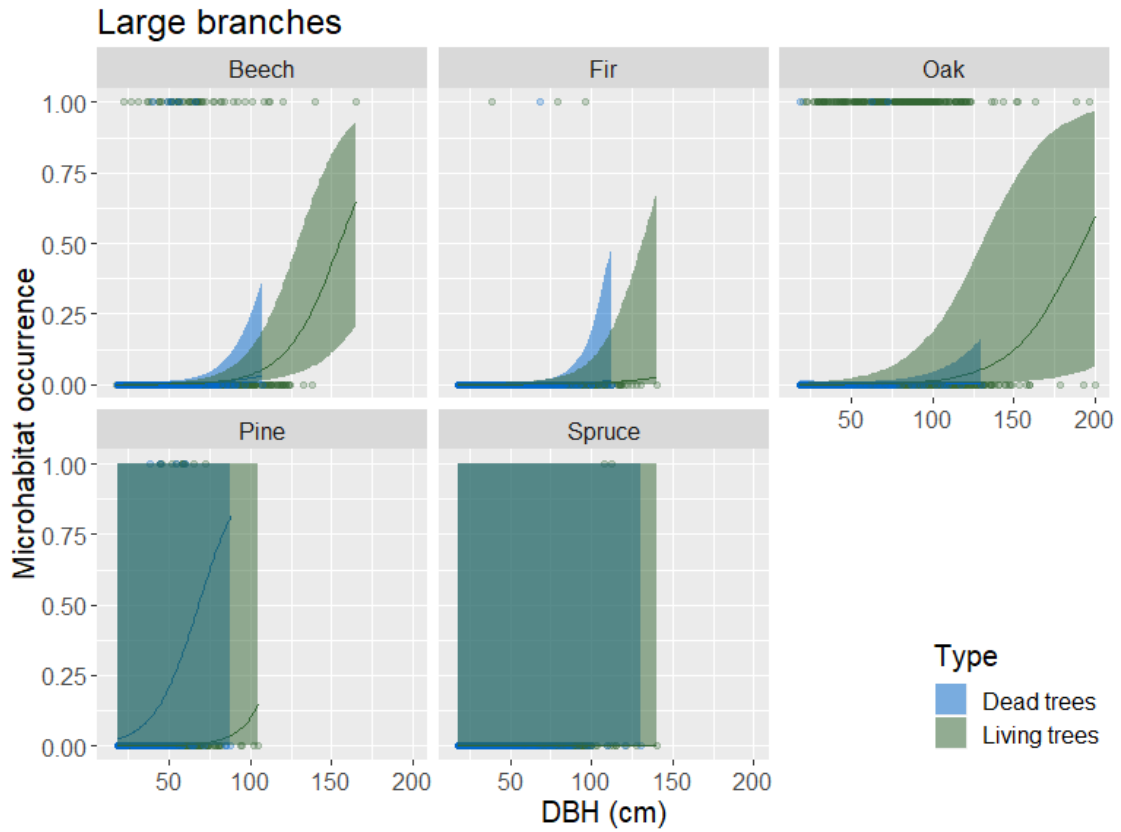

658

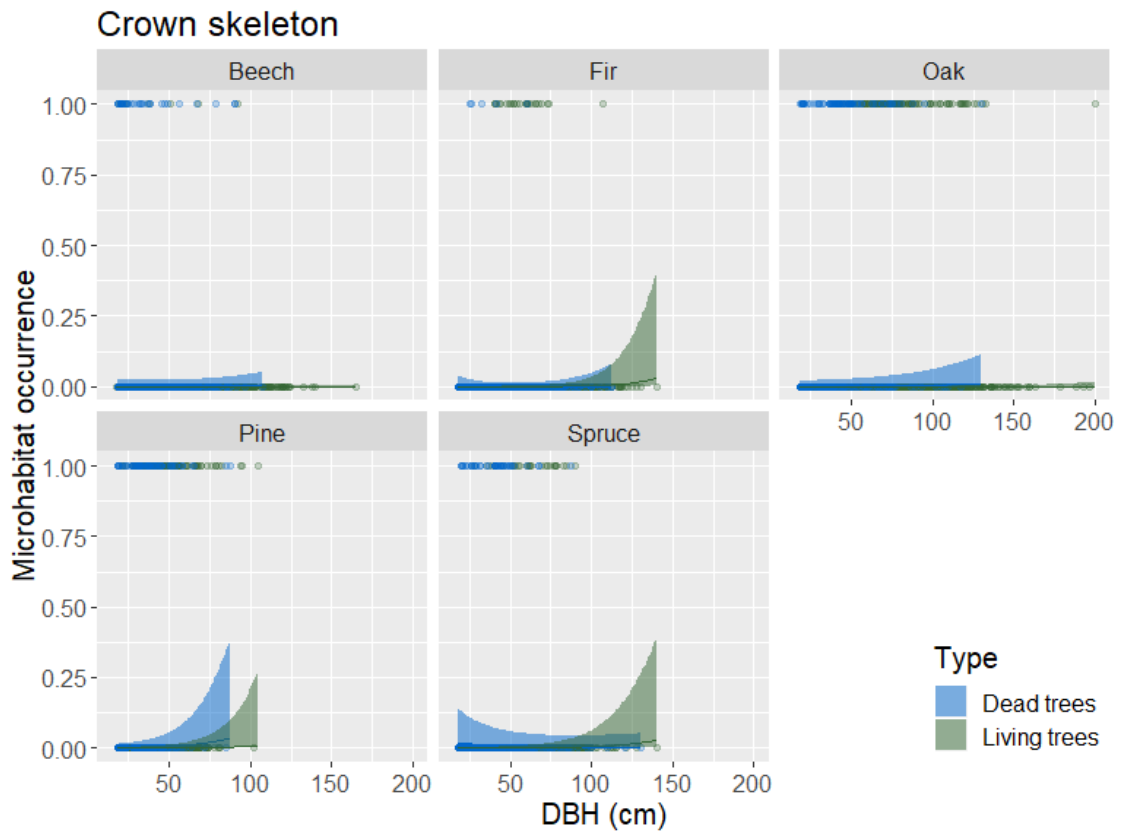

659

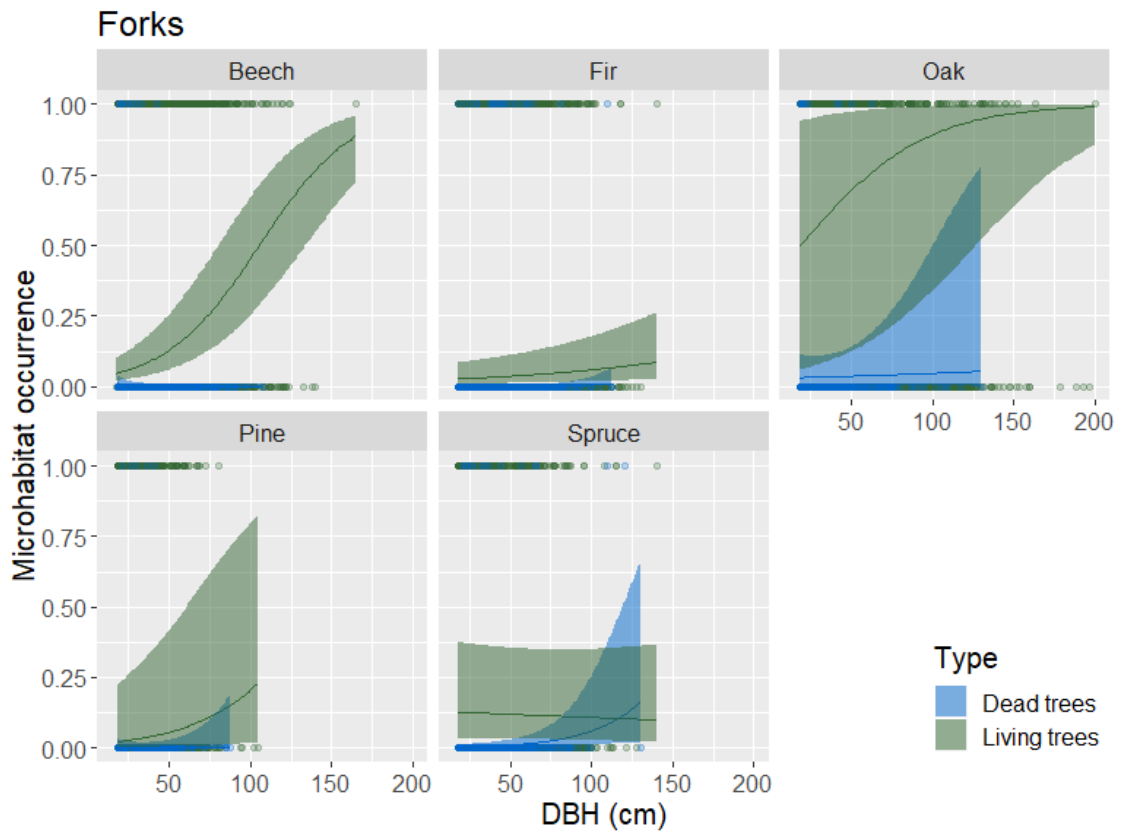

660

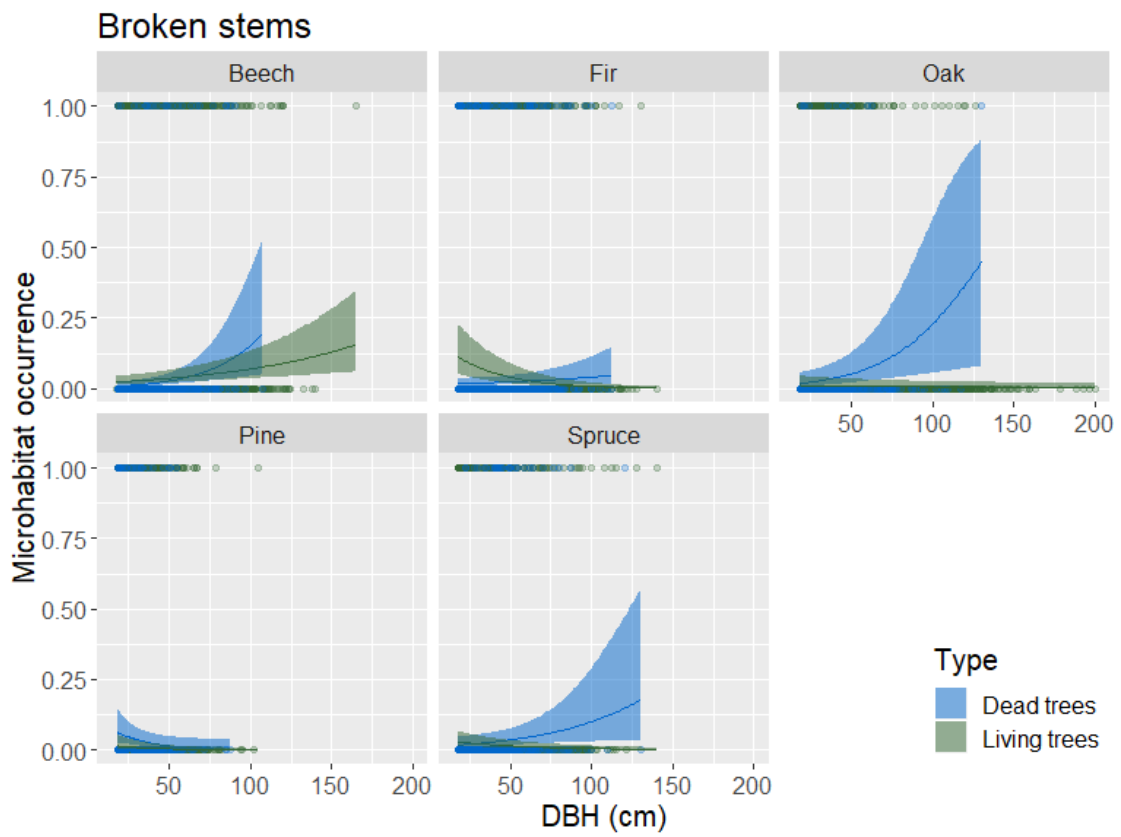

661
